# Supplementary material for: Genome-Wide Analysis of bZIP-Encoding Genes in Maize
Source: PubMed Central journal article supplement — DNA Res. 2012 Oct 26;19(6):463–76. doi: 10.1093/dnares/dss026 (PMC3514857; doi:10.1093/dnares/dss026), 2012-10-26

**Supplemental Figure S1.** The phylogenetic analysis of bZIP proteins based on the bZIP domain sequences in maize, rice and Arabidopsis. The phylogenetic tree was constructed by PhymI with model (JTT+G) selected by Akaike information criterion (AIC) implemented in ProtTest 3.0. Bootstrap values from 100 replicates are indicated at each node.

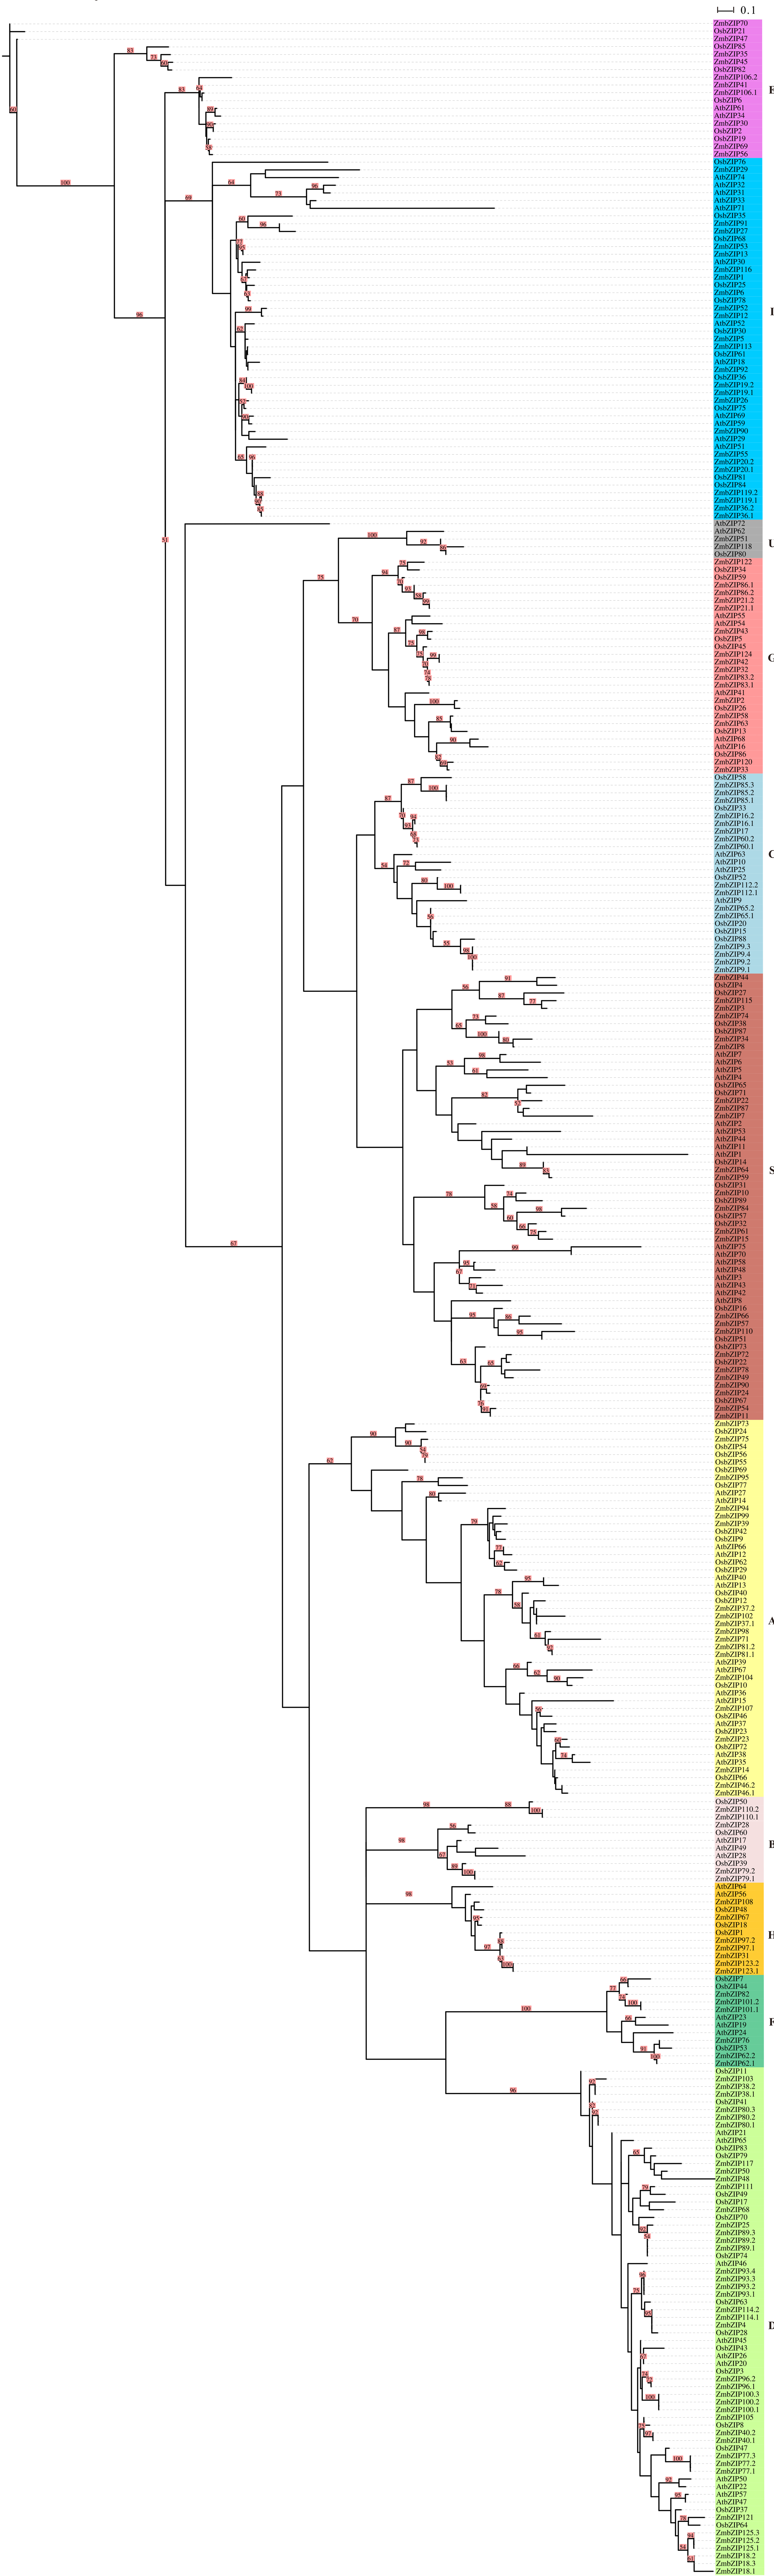

Supplement: supp_dss026_dss026supp_fig1.pdf [file supp_dss026_dss026supp_fig1.pdf]
