# Supplementary material for: Genome-Wide Analysis of bZIP-Encoding Genes in Maize
Source: PubMed Central journal article supplement — DNA Res. 2012 Oct 26;19(6):463–76. doi: 10.1093/dnares/dss026 (PMC3514857; doi:10.1093/dnares/dss026), 2012-10-26

**Supplemental Figure S2.** Phylogenetic relationship among the 170 ZmbZIP proteins based on (a) bZIP domain (b) basic and hinge regions (c) leucine zipper. Color-strategy of each tree is the same with the phylogenetic tree of bZIP domain as shown in color range.

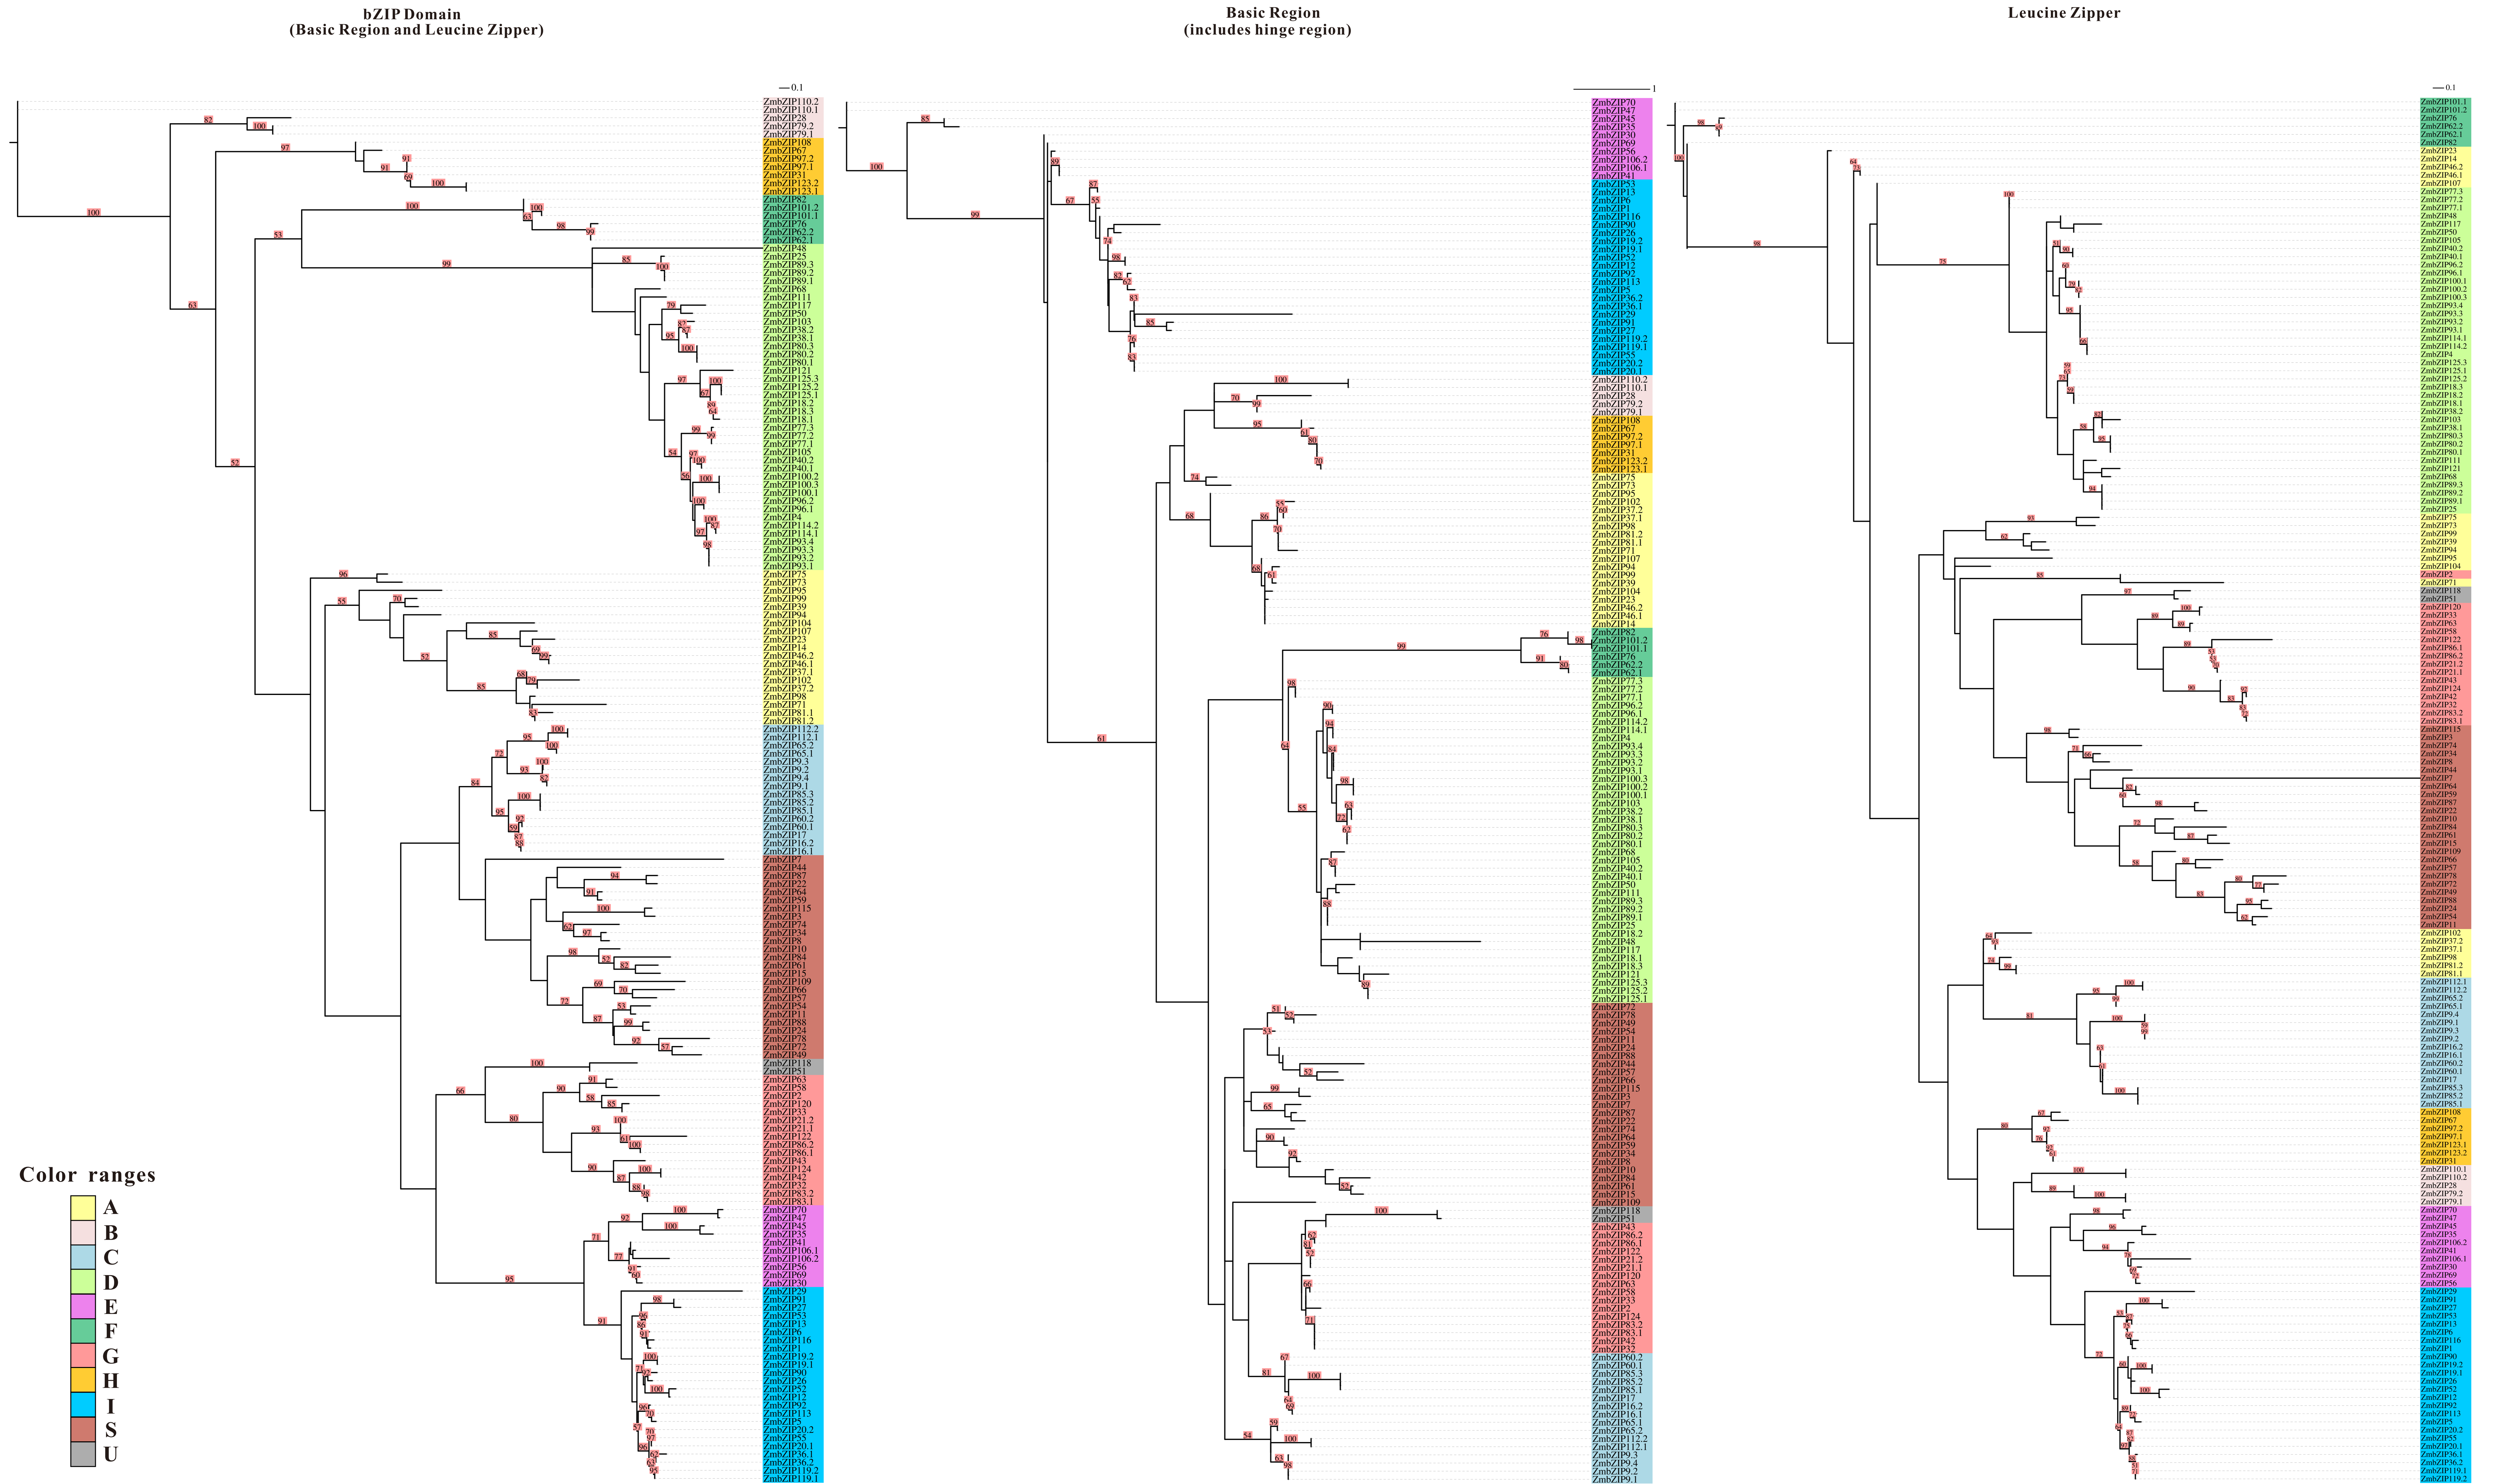

Supplement: supp_dss026_dss026supp_fig2.pdf [file supp_dss026_dss026supp_fig2.pdf]
