# Supplementary material for: Genome-Wide Analysis of bZIP-Encoding Genes in Maize
Source: PubMed Central journal article supplement — DNA Res. 2012 Oct 26;19(6):463–76. doi: 10.1093/dnares/dss026 (PMC3514857; doi:10.1093/dnares/dss026), 2012-10-26
Supplement: supp_dss026_dss026supp_fig4.pdf [file supp_dss026_dss026supp_fig4.pdf]

**Supplemental Figure S4.** Position and pattern of introns within the basic and hinge regions of bZIP domains of the ZmbZIP transcription factors.

| Group       | bZIP No.         | PUBLISHED       | BASIC REGION |               | HINGE           | Pattern of introns |                 |                 |                 |             |   |
|-------------|------------------|-----------------|--------------|---------------|-----------------|--------------------|-----------------|-----------------|-----------------|-------------|---|
|             |                  |                 | -30          | -25           | -20             |                    | -15             | -10             | -5              | 0           |   |
| A           | <b>Os bZIP66</b> | <b>TRAB1</b>    | <b>KV</b>    | <b>VERR</b>   | <b>QRRMIK</b>   | <b>NRESAARS</b>    | <b>SRARKQ</b>   | <b>AY</b>       | <b>TM</b>       | <b>EL</b>   | a |
|             | <b>Os bZIP5</b>  | <b>OSBZ8</b>    | <b>DK</b>    | <b>ESKRE</b>  | <b>RRKQ</b>     | <b>SNRESA</b>      | <b>RRSRLR</b>   | <b>KQ</b>       | <b>AE</b>       | <b>TEEL</b> |   |
|             | <b>Os bZIP80</b> | <b>OsZIP-2a</b> | <b>EK</b>    | <b>EAKRL</b>  | <b>RRVLAN</b>   | <b>RESARQ</b>      | <b>TILRRQ</b>   | <b>AI</b>       | <b>R</b>        | <b>DEL</b>  |   |
|             | ZmbZIP14         |                 | <b>KV</b>    | <b>VERR</b>   | <b>QRRMIK</b>   | <b>NRESAARS</b>    | <b>SRARKQ</b>   | <b>AY</b>       | <b>TM</b>       | <b>EL</b>   |   |
|             | ZmbZIP23         | <b>ZmbZIP72</b> | <b>KV</b>    | <b>VERR</b>   | <b>RRRMIK</b>   | <b>NRESAARS</b>    | <b>SRARKQ</b>   | <b>AY</b>       | <b>TM</b>       | <b>EL</b>   |   |
|             | ZmbZIP37.1       |                 | <b>RA</b>    | <b>AMQR</b>   | <b>QKRMIK</b>   | <b>NRESAARS</b>    | <b>SRERKQ</b>   | <b>AY</b>       | <b>IA</b>       | <b>E</b>    |   |
|             | ZmbZIP37.2       |                 | <b>RA</b>    | <b>AMQR</b>   | <b>QKRMIK</b>   | <b>NRESAARS</b>    | <b>SRERKQ</b>   | <b>AY</b>       | <b>IA</b>       | <b>E</b>    |   |
|             | ZmbZIP39         |                 | <b>KL</b>    | <b>VERR</b>   | <b>QKRMIK</b>   | <b>NRESAARS</b>    | <b>SRARKQ</b>   | <b>AY</b>       | <b>TN</b>       | <b>EL</b>   |   |
|             | ZmbZIP46.1       |                 | <b>KV</b>    | <b>VERR</b>   | <b>QRRMIK</b>   | <b>NRESAARS</b>    | <b>SRARKQ</b>   | <b>AY</b>       | <b>TM</b>       | <b>EL</b>   |   |
|             | ZmbZIP46.2       |                 | <b>KV</b>    | <b>VERR</b>   | <b>QRRMIK</b>   | <b>NRESAARS</b>    | <b>SRARKQ</b>   | <b>AY</b>       | <b>TM</b>       | <b>EL</b>   |   |
|             | ZmbZIP71         |                 | <b>RA</b>    | <b>VMQR</b>   | <b>QKRMIK</b>   | <b>NRESAASS</b>    | <b>SRDRKQ</b>   | <b>AA</b>       | <b>LE</b>       | <b>E</b>    |   |
|             | ZmbZIP73         |                 | <b>YD</b>    | <b>DERKN</b>  | <b>IRMMRN</b>   | <b>NRESALRS</b>    | <b>SRARKQ</b>   | <b>AY</b>       | <b>VQ</b>       | <b>EL</b>   |   |
|             | ZmbZIP75         |                 | <b>SG</b>    | <b>DDRRS</b>  | <b>IRMMRN</b>   | <b>NRESALRS</b>    | <b>SRARKQ</b>   | <b>AY</b>       | <b>VEN</b>      | <b>L</b>    |   |
|             | ZmbZIP81.1       |                 | <b>RA</b>    | <b>VMQR</b>   | <b>QKRMIK</b>   | <b>NRESAARS</b>    | <b>SRDRKQ</b>   | <b>AY</b>       | <b>IA</b>       | <b>E</b>    |   |
|             | ZmbZIP81.2       |                 | <b>RA</b>    | <b>VMQR</b>   | <b>QKRMIK</b>   | <b>NRESAARS</b>    | <b>SRDRKQ</b>   | <b>AY</b>       | <b>IA</b>       | <b>E</b>    |   |
|             | ZmbZIP94         |                 | <b>RT</b>    | <b>VERR</b>   | <b>QKRMIK</b>   | <b>NRESAARS</b>    | <b>SRARKQ</b>   | <b>AY</b>       | <b>TN</b>       | <b>EL</b>   |   |
|             | ZmbZIP98         |                 | <b>RA</b>    | <b>VMQR</b>   | <b>QKRMIK</b>   | <b>NRESAARS</b>    | <b>SRDRKQ</b>   | <b>AY</b>       | <b>VA</b>       | <b>E</b>    |   |
|             | ZmbZIP99         |                 | <b>KV</b>    | <b>VERR</b>   | <b>QKRMIK</b>   | <b>NRESAARS</b>    | <b>SRARKQ</b>   | <b>AY</b>       | <b>TN</b>       | <b>EL</b>   |   |
|             | ZmbZIP102        |                 | <b>RS</b>    | <b>AIQRE</b>  | <b>KRMIKN</b>   | <b>NRESAARS</b>    | <b>SRERKQ</b>   | <b>AY</b>       | <b>IA</b>       | <b>E</b>    |   |
|             | ZmbZIP104        |                 | <b>KT</b>    | <b>VERR</b>   | <b>QRRMIK</b>   | <b>NRESAARS</b>    | <b>SRARKQ</b>   | <b>AY</b>       | <b>TV</b>       | <b>EL</b>   |   |
|             | ZmbZIP107        |                 | <b>KV</b>    | <b>VERR</b>   | <b>QRRMIK</b>   | <b>NRESAARS</b>    | <b>SRARKQ</b>   | <b>AY</b>       | <b>TM</b>       | <b>EL</b>   |   |
|             | ZmbZIP48         |                 | <b>TV</b>    | <b>IHS</b>    | <b>GHAAAY</b>   | <b>NREAAK</b>      | <b>SLLRKQ</b>   | <b>AY</b>       | <b>IQ</b>       | <b>QL</b>   |   |
|             | ZmbZIP18.2       |                 | <b>---</b>   | <b>---</b>    | <b>---</b>      | <b>---</b>         | <b>---</b>      | <b>---</b>      | <b>---</b>      | <b>---</b>  |   |
|             | ZmbZIP68         |                 | <b>TS</b>    | <b>DAKT</b>   | <b>LRRLAQ</b>   | <b>NREAAK</b>      | <b>SLLRKQ</b>   | <b>AY</b>       | <b>IQ</b>       | <b>QL</b>   |   |
|             | ZmbZIP2          |                 | <b>GR</b>    | <b>E</b>      | <b>LKRQ</b>     | <b>KRKQ</b>        | <b>SNRESA</b>   | <b>RRSRLR</b>   | <b>KQ</b>       | <b>AE</b>   |   |
| ZmbZIP21.1  |                  | <b>ER</b>       | <b>E</b>     | <b>LKRERR</b> | <b>KQSNRESA</b> | <b>RRSRLR</b>      | <b>KQ</b>       | <b>QE</b>       | <b>CEEL</b>     |             |   |
| ZmbZIP21.2  |                  | <b>ER</b>       | <b>E</b>     | <b>LKRERR</b> | <b>KQSNRESA</b> | <b>RRSRLR</b>      | <b>KQ</b>       | <b>QE</b>       | <b>CEEL</b>     |             |   |
| ZmbZIP32    |                  | <b>ER</b>       | <b>E</b>     | <b>LKREKR</b> | <b>KQSNRESA</b> | <b>RRSRLR</b>      | <b>KQ</b>       | <b>AE</b>       | <b>TEEL</b>     |             |   |
| ZmbZIP33    |                  | <b>ER</b>       | <b>E</b>     | <b>LKRQ</b>   | <b>KRKQ</b>     | <b>SNRESA</b>      | <b>RRSRLR</b>   | <b>KQ</b>       | <b>AE</b>       |             |   |
| ZmbZIP42    |                  | <b>ER</b>       | <b>E</b>     | <b>LKREKR</b> | <b>KQSNRESA</b> | <b>RRSRLR</b>      | <b>KQ</b>       | <b>AE</b>       | <b>TEEL</b>     |             |   |
| ZmbZIP43    |                  | <b>DK</b>       | <b>ESKRE</b> | <b>RRKQ</b>   | <b>SNRESA</b>   | <b>RRSRLR</b>      | <b>KQ</b>       | <b>AE</b>       | <b>TEEL</b>     |             |   |
| ZmbZIP58    |                  | <b>ER</b>       | <b>E</b>     | <b>LKQ</b>    | <b>KRKQ</b>     | <b>SNRESA</b>      | <b>RRSRLR</b>   | <b>KQ</b>       | <b>AE</b>       |             |   |
| ZmbZIP63    |                  | <b>ER</b>       | <b>E</b>     | <b>LKQ</b>    | <b>KRKQ</b>     | <b>SNRESA</b>      | <b>RRSRLR</b>   | <b>KQ</b>       | <b>AE</b>       |             |   |
| ZmbZIP83.1  | <b>ZmGBF1</b>    | <b>ER</b>       | <b>E</b>     | <b>LKREKR</b> | <b>KQSNRESA</b> | <b>RRSRLR</b>      | <b>KQ</b>       | <b>AE</b>       | <b>TEEL</b>     |             |   |
| ZmbZIP83.2  |                  | <b>ER</b>       | <b>E</b>     | <b>LKREKR</b> | <b>KQSNRESA</b> | <b>RRSRLR</b>      | <b>KQ</b>       | <b>AE</b>       | <b>TEEL</b>     |             |   |
| ZmbZIP86.1  | <b>mEmBP-1a</b>  | <b>ER</b>       | <b>E</b>     | <b>IKRE</b>   | <b>RRKQ</b>     | <b>SNRESA</b>      | <b>RRSRLR</b>   | <b>KQ</b>       | <b>QE</b>       |             |   |
| ZmbZIP86.2  |                  | <b>ER</b>       | <b>E</b>     | <b>IKRE</b>   | <b>RRKQ</b>     | <b>SNRESA</b>      | <b>RRSRLR</b>   | <b>KQ</b>       | <b>QE</b>       |             |   |
| ZmbZIP120   |                  | <b>E</b>        | <b>H</b>     | <b>LKQ</b>    | <b>RRKQ</b>     | <b>SNRESA</b>      | <b>RRSRLR</b>   | <b>KQ</b>       | <b>AE</b>       |             |   |
| ZmbZIP122   |                  | <b>ER</b>       | <b>E</b>     | <b>LKRE</b>   | <b>RRKQ</b>     | <b>SNRESA</b>      | <b>RRSRLR</b>   | <b>KQ</b>       | <b>QE</b>       |             |   |
| ZmbZIP124   |                  | <b>ER</b>       | <b>E</b>     | <b>LKRE</b>   | <b>RRKQ</b>     | <b>SNRESA</b>      | <b>RRSRLR</b>   | <b>KQ</b>       | <b>AE</b>       |             |   |
| ZmbZIP118   |                  | <b>E</b>        | <b>K</b>     | <b>EAKRL</b>  | <b>RRVLAN</b>   | <b>RESARQ</b>      | <b>TILRRQ</b>   | <b>AI</b>       | <b>R</b>        |             |   |
| D           | <b>Os bZIP11</b> |                 | <b>SV</b>    | <b>DAK</b>    | <b>TERR</b>     | <b>LAQNRE</b>      | <b>AARKSRLR</b> | <b>KQ</b>       | <b>AY</b>       | <b>VQ</b>   | b |
|             | ZmbZIP4          |                 | <b>PM</b>    | <b>DQK</b>    | <b>VLRR</b>     | <b>LAQNRE</b>      | <b>AARKSRLR</b> | <b>KQ</b>       | <b>AY</b>       | <b>VQ</b>   |   |
|             | ZmbZIP18.1       |                 | <b>ER</b>    | <b>VRT</b>    | <b>VMRR</b>     | <b>LAQNRE</b>      | <b>AARKSRLR</b> | <b>KQ</b>       | <b>AY</b>       | <b>IQ</b>   |   |
|             | ZmbZIP18.3       |                 | <b>R</b>     | <b>PPER</b>   | <b>VMRR</b>     | <b>LAQNRE</b>      | <b>AARKSRLR</b> | <b>KQ</b>       | <b>AY</b>       | <b>IQ</b>   |   |
|             | ZmbZIP25         |                 | <b>ER</b>    | <b>DPK</b>    | <b>T</b>        | <b>LRRLAQ</b>      | <b>NREAAK</b>   | <b>SRLR</b>     | <b>KQ</b>       | <b>AY</b>   |   |
|             | ZmbZIP38.1       | <b>LG2</b>      | <b>L</b>     | <b>VDAK</b>   | <b>TERR</b>     | <b>LAQNRE</b>      | <b>AARKSRLR</b> | <b>KQ</b>       | <b>AY</b>       | <b>VQ</b>   |   |
|             | ZmbZIP38.2       |                 | <b>L</b>     | <b>VDAK</b>   | <b>TERR</b>     | <b>LAQNRE</b>      | <b>AARKSRLR</b> | <b>KQ</b>       | <b>AY</b>       | <b>VQ</b>   |   |
|             | ZmbZIP40.1       | <b>OB</b>       | <b>K</b>     | <b>L</b>      | <b>DQK</b>      | <b>T</b>           | <b>LRRLAQ</b>   | <b>NREAAK</b>   | <b>SRLR</b>     | <b>KQ</b>   |   |
|             | ZmbZIP40.2       | <b>F3.1</b>     | <b>K</b>     | <b>L</b>      | <b>DQK</b>      | <b>T</b>           | <b>LRRLAQ</b>   | <b>NREAAK</b>   | <b>SRLR</b>     | <b>KQ</b>   |   |
|             | ZmbZIP50         |                 | <b>A</b>     | <b>L</b>      | <b>DPK</b>      | <b>V</b>           | <b>IRRLAQ</b>   | <b>NREAAK</b>   | <b>SRLR</b>     | <b>KQ</b>   |   |
|             | ZmbZIP77.1       |                 | <b>P</b>     | <b>R</b>      | <b>DHK</b>      | <b>A</b>           | <b>QRR</b>      | <b>LAQNRE</b>   | <b>AARKSR</b>   | <b>MRKQ</b> |   |
|             | ZmbZIP77.2       |                 | <b>P</b>     | <b>R</b>      | <b>DHK</b>      | <b>A</b>           | <b>QRR</b>      | <b>LAQNRE</b>   | <b>AARKSR</b>   | <b>MRKQ</b> |   |
|             | ZmbZIP77.3       |                 | <b>P</b>     | <b>R</b>      | <b>DHK</b>      | <b>A</b>           | <b>QRR</b>      | <b>LAQNRE</b>   | <b>AARKSR</b>   | <b>MRKQ</b> |   |
|             | ZmbZIP80.1       |                 | <b>L</b>     | <b>L</b>      | <b>DAK</b>      | <b>TERR</b>        | <b>LAQNRE</b>   | <b>AARKSRLR</b> | <b>KQ</b>       | <b>AY</b>   |   |
|             | ZmbZIP80.2       |                 | <b>L</b>     | <b>L</b>      | <b>DAK</b>      | <b>TERR</b>        | <b>LAQNRE</b>   | <b>AARKSRLR</b> | <b>KQ</b>       | <b>AY</b>   |   |
|             | ZmbZIP80.3       |                 | <b>L</b>     | <b>L</b>      | <b>DAK</b>      | <b>TERR</b>        | <b>LAQNRE</b>   | <b>AARKSRLR</b> | <b>KQ</b>       | <b>AY</b>   |   |
|             | ZmbZIP89.1       |                 | <b>ER</b>    | <b>DPK</b>    | <b>T</b>        | <b>LRRLAQ</b>      | <b>NREAAK</b>   | <b>SRLR</b>     | <b>KQ</b>       | <b>AY</b>   |   |
|             | ZmbZIP89.2       |                 | <b>ER</b>    | <b>DPK</b>    | <b>T</b>        | <b>LRRLAQ</b>      | <b>NREAAK</b>   | <b>SRLR</b>     | <b>KQ</b>       | <b>AY</b>   |   |
|             | ZmbZIP89.3       |                 | <b>ER</b>    | <b>DPK</b>    | <b>T</b>        | <b>LRRLAQ</b>      | <b>NREAAK</b>   | <b>SRLR</b>     | <b>KQ</b>       | <b>AY</b>   |   |
|             | ZmbZIP93.1       |                 | <b>P</b>     | <b>L</b>      | <b>DQK</b>      | <b>T</b>           | <b>MRRLAQ</b>   | <b>NREAAK</b>   | <b>SRLR</b>     | <b>KQ</b>   |   |
|             | ZmbZIP93.2       |                 | <b>P</b>     | <b>L</b>      | <b>DQK</b>      | <b>T</b>           | <b>MRRLAQ</b>   | <b>NREAAK</b>   | <b>SRLR</b>     | <b>KQ</b>   |   |
|             | ZmbZIP93.3       |                 | <b>P</b>     | <b>L</b>      | <b>DQK</b>      | <b>T</b>           | <b>MRRLAQ</b>   | <b>NREAAK</b>   | <b>SRLR</b>     | <b>KQ</b>   |   |
|             | ZmbZIP93.4       |                 | <b>P</b>     | <b>L</b>      | <b>DQK</b>      | <b>T</b>           | <b>MRRLAQ</b>   | <b>NREAAK</b>   | <b>SRLR</b>     | <b>KQ</b>   |   |
|             | ZmbZIP96.1       |                 | <b>H</b>     | <b>G</b>      | <b>DQK</b>      | <b>T</b>           | <b>LRRLAQ</b>   | <b>NREAAK</b>   | <b>SRLR</b>     | <b>KQ</b>   |   |
|             | ZmbZIP96.2       |                 | <b>H</b>     | <b>G</b>      | <b>DQK</b>      | <b>T</b>           | <b>LRRLAQ</b>   | <b>NREAAK</b>   | <b>SRLR</b>     | <b>KQ</b>   |   |
| ZmbZIP100.1 |                  | <b>L</b>        | <b>L</b>     | <b>GQK</b>    | <b>A</b>        | <b>LRRLAQ</b>      | <b>NREAAK</b>   | <b>SRLR</b>     | <b>KQ</b>       |             |   |
| ZmbZIP100.2 |                  | <b>L</b>        | <b>L</b>     | <b>GQK</b>    | <b>A</b>        | <b>LRRLAQ</b>      | <b>NREAAK</b>   | <b>SRLR</b>     | <b>KQ</b>       |             |   |
| ZmbZIP100.3 |                  | <b>L</b>        | <b>L</b>     | <b>GQK</b>    | <b>A</b>        | <b>LRRLAQ</b>      | <b>NREAAK</b>   | <b>SRLR</b>     | <b>KQ</b>       |             |   |
| ZmbZIP103   |                  | <b>L</b>        | <b>V</b>     | <b>DAK</b>    | <b>TERR</b>     | <b>LAQNRE</b>      | <b>AARKSRLR</b> | <b>KQ</b>       | <b>AY</b>       |             |   |
| ZmbZIP105   | <b>OB</b>        | <b>K</b>        | <b>L</b>     | <b>DQK</b>    | <b>T</b>        | <b>LRRLAQ</b>      | <b>NREAAK</b>   | <b>SRLR</b>     | <b>KQ</b>       |             |   |
| ZmbZIP111   | <b>F3.2</b>      | <b>T</b>        | <b>P</b>     | <b>DPK</b>    | <b>T</b>        | <b>LRRLAQ</b>      | <b>NREAAK</b>   | <b>SRLR</b>     | <b>KQ</b>       |             |   |
| ZmbZIP114.1 |                  | <b>P</b>        | <b>M</b>     | <b>DQK</b>    | <b>V</b>        | <b>LRRLAQ</b>      | <b>NREAAK</b>   | <b>SRLR</b>     | <b>KQ</b>       |             |   |
| ZmbZIP114.2 |                  | <b>P</b>        | <b>M</b>     | <b>DQK</b>    | <b>V</b>        | <b>LRRLAQ</b>      | <b>NREAAK</b>   | <b>SRLR</b>     | <b>KQ</b>       |             |   |
| ZmbZIP117   |                  | <b>L</b>        | <b>K</b>     | <b>H</b>      | <b>F</b>        | <b>L</b>           | <b>T</b>        | <b>IRRLAQ</b>   | <b>NREAAK</b>   |             |   |
| ZmbZIP121   |                  | <b>R</b>        | <b>P</b>     | <b>R</b>      | <b>DK</b>       | <b>V</b>           | <b>QRR</b>      | <b>LAQNRE</b>   | <b>AARKSRLR</b> |             |   |
| ZmbZIP125.1 |                  | <b>R</b>        | <b>P</b>     | <b>P</b>      | <b>E</b>        | <b>A</b>           | <b>QRR</b>      | <b>LAQNRE</b>   | <b>AARKSRLR</b> |             |   |
| ZmbZIP125.2 |                  | <b>R</b>        | <b>P</b>     | <b>P</b>      | <b>E</b>        | <b>A</b>           | <b>QRR</b>      | <b>LAQNRE</b>   | <b>AARKSRLR</b> |             |   |
| ZmbZIP125.3 |                  | <b>R</b>        | <b>P</b>     | <b>P</b>      | <b>E</b>        | <b>A</b>           | <b>QRR</b>      | <b>LAQNRE</b>   | <b>AARKSRLR</b> |             |   |
| B           | <b>Os bZIP30</b> | <b>RF2b</b>     | <b>A</b>     | <b>I</b>      | <b>D</b>        | <b>P</b>           | <b>K</b>        | <b>R</b>        | <b>A</b>        | <b>K</b>    | c |
|             | <b>Os bZIP33</b> | <b>REB</b>      | <b>P</b>     | <b>A</b>      | <b>D</b>        | <b>Q</b>           | <b>R</b>        | <b>L</b>        | <b>Q</b>        | <b>R</b>    |   |
|             | <b>Os bZIP50</b> |                 | <b>D</b>     | <b>P</b>      | <b>M</b>        | <b>S</b>           | <b>K</b>        | <b>K</b>        | <b>R</b>        | <b>R</b>    |   |
|             | ZmbZIP110.1      |                 | <b>D</b>     | <b>P</b>      | <b>I</b>        | <b>S</b>           | <b>K</b>        | <b>K</b>        | <b>M</b>        | <b>R</b>    |   |
|             | ZmbZIP110.2      |                 | <b>D</b>     | <b>P</b>      | <b>I</b>        | <b>S</b>           | <b>K</b>        | <b>K</b>        | <b>M</b>        | <b>R</b>    |   |
|             | ZmbZIP9.1        |                 | <b>P</b>     | <b>A</b>      | <b>N</b>        | <b>A</b>           | <b>K</b>        | <b>M</b>        | <b>R</b>        | <b>R</b>    |   |
|             | ZmbZIP9.2        |                 | <b>P</b>     | <b>A</b>      | <b>N</b>        | <b>A</b>           | <b>K</b>        | <b>M</b>        | <b>R</b>        | <b>R</b>    |   |
|             | ZmbZIP9.4        |                 | <b>P</b>     | <b>A</b>      | <b>N</b>        | <b>A</b>           | <b>K</b>        | <b>M</b>        | <b>R</b>        | <b>R</b>    |   |
|             | ZmbZIP16.1       |                 | <b>P</b>     | <b>V</b>      | <b>Q</b>        | <b>H</b>           | <b>R</b>        | <b>L</b>        | <b>Q</b>        | <b>R</b>    |   |
|             | ZmbZIP16.2       |                 | <b>P</b>     | <b>V</b>      | <b>Q</b>        | <b>H</b>           | <b>R</b>        | <b>L</b>        | <b>Q</b>        | <b>R</b>    |   |
|             | ZmbZIP17         | <b>OHP1</b>     | <b>P</b>     | <b>V</b>      | <b>Q</b>        | <b>H</b>           | <b>R</b>        | <b>L</b>        | <b>Q</b>        | <b>R</b>    |   |
|             | ZmbZIP60.1       | <b>OHP2</b>     | <b>P</b>     | <b>V</b>      | <b>Q</b>        | <b>H</b>           | <b>R</b>        | <b>L</b>        | <b>Q</b>        | <b>R</b>    |   |
|             | ZmbZIP60.2       |                 | <b>P</b>     | <b>V</b>      | <b>Q</b>        | <b>H</b>           | <b>R</b>        | <b>L</b>        | <b>Q</b>        | <b>R</b>    |   |
|             | ZmbZIP65.1       |                 | <b>P</b>     | <b>Q</b>      | <b>D</b>        | <b>V</b>           | <b>K</b>        | <b>M</b>        | <b>R</b>        | <b>R</b>    |   |
|             | ZmbZIP85.1       | <b>Opaque2</b>  | <b>P</b>     | <b>T</b>      | <b>E</b>        | <b>R</b>           | <b>V</b>        | <b>R</b>        | <b>K</b>        | <b>R</b>    |   |
|             | ZmbZIP85.2       |                 | <b>P</b>     | <b>T</b>      | <b>E</b>        | <b>R</b>           | <b>V</b>        | <b>R</b>        | <b>K</b>        | <b>R</b>    |   |
|             | ZmbZIP85.3       |                 | <b>P</b>     | <b>T</b>      | <b>E</b>        | <b>R</b>           | <b>V</b>        | <b>R</b>        | <b>K</b>        | <b>R</b>    |   |
|             | ZmbZIP112.1      |                 | <b>S</b>     | <b>I</b>      | <b>E</b>        | <b>T</b>           | <b>K</b>        | <b>I</b>        | <b>R</b>        | <b>R</b>    |   |
|             | ZmbZIP112.2      |                 | <b>S</b>     | <b>I</b>      | <b>E</b>        | <b>T</b>           | <b>K</b>        | <b>I</b>        | <b>R</b>        | <b>R</b>    |   |
|             | ZmbZIP30         |                 | <b>A</b>     | <b>V</b>      | <b>D</b>        | <b>P</b>           | <b>K</b>        | <b>R</b>        | <b>V</b>        | <b>K</b>    |   |
|             | ZmbZIP41         |                 | <b>I</b>     | <b>R</b>      | <b>D</b>        | <b>P</b>           | <b>K</b>        | <b>R</b>        | <b>V</b>        | <b>K</b>    |   |
|             | ZmbZIP56         |                 | <b>V</b>     | <b>A</b>      | <b>E</b>        | <b>P</b>           | <b>K</b>        | <b>R</b>        | <b>V</b>        | <b>K</b>    |   |
|             | ZmbZIP69         |                 | <b>A</b>     | <b>A</b>      | <b>D</b>        | <b>P</b>           | <b>K</b>        | <b>R</b>        | <b>V</b>        | <b>K</b>    |   |
|             | ZmbZIP106.1      |                 | <b>I</b>     | <b>R</b>      | <b>D</b>        | <b>P</b>           | <b>K</b>        | <b>R</b>        | <b>V</b>        | <b>K</b>    |   |
|             | ZmbZIP106.2      |                 | <b>I</b>     | <b>R</b>      | <b>D</b>        | <b>P</b>           | <b>K</b>        | <b>R</b>        | <b>V</b>        | <b>K</b>    |   |
| ZmbZIP67    |                  | <b>D</b>        | <b>K</b>     | <b>E</b>      | <b>H</b>        | <b>R</b>           | <b>L</b>        | <b>K</b>        | <b>R</b>        |             |   |
| ZmbZIP108   |                  | <b>D</b>        | <b>K</b>     | <b>E</b>      | <b>H</b>        | <b>R</b>           | <b>L</b>        | <b>K</b>        | <b>R</b>        |             |   |
| ZmbZIP1     |                  | <b>L</b>        | <b>A</b>     | <b>D</b>      | <b>P</b>        | <b>K</b>           | <b>R</b>        | <b>V</b>        | <b>K</b>        |             |   |
| ZmbZIP5     |                  | <b>A</b>        | <b>I</b>     | <b>D</b>      | <b>P</b>        | <b>K</b>           | <b>R</b>        | <b>A</b>        | <b>K</b>        |             |   |
| ZmbZIP6     |                  | <b>L</b>        | <b>A</b>     | <b>D</b>      | <b>P</b>        | <b>K</b>           | <b>R</b>        | <b>V</b>        | <b>K</b>        |             |   |
| ZmbZIP12    |                  | <b>L</b>        | <b>I</b>     | <b>D</b>      | <b>P</b>        | <b>K</b>           | <b>A</b>        | <b>K</b>        | <b>R</b>        |             |   |
| ZmbZIP13    |                  | <b>L</b>        | <b>T</b>     | <b>D</b>      | <b>P</b>        | <b>K</b>           | <b>R</b>        | <b>V</b>        | <b>K</b>        |             |   |
| ZmbZIP19.1  |                  | <b>L</b>        | <b>V</b>     | <b>D</b>      | <b>P</b>        | <b>K</b>           | <b>R</b>        | <b>A</b>        | <b>K</b>        |             |   |
| ZmbZIP19.2  |                  | <b>L</b>        | <b>V</b>     | <b>D</b>      | <b>P</b>        | <b>K</b>           | <b>R</b>        |                 |                 |             |   |
