# Supplementary material for: Genome-Wide Analysis of bZIP-Encoding Genes in Maize
Source: PubMed Central journal article supplement — DNA Res. 2012 Oct 26;19(6):463–76. doi: 10.1093/dnares/dss026 (PMC3514857; doi:10.1093/dnares/dss026), 2012-10-26
Supplement: supp_dss026_dss026supp_fig6.pdf [file supp_dss026_dss026supp_fig6.pdf]

**Supplemental Figure S6.** Alignment of basic and hinge regions of 170 ZmbZIP proteins.

The ZmbZIP proteins are classified into 11 groups (A-I, S, U). Conserved amino acids are boxed in red. Amino acid numbering is according to Suckow et al [1]. and Nijhawan et al [2]. The first leucine in leucine heptad repeats is numbered +1. Some of the functional annotated bZIP proteins in maize, rice and Arabidopsis sharing similar amino acid sequences in the basic and hinge regions are also shown as reference. The different amino acid residues at -10 and -18 positions like K and I are colored.

| ZmbZIP No.       | PUBLISHED           | BASIC REGION |          |          |          |          |          | HINGE    | GROUP    |          |          |          |          |          |          |          |          |          |          |          |          |          |          |          |          |          |          |          |          |          |          |          |          |     |     |
|------------------|---------------------|--------------|----------|----------|----------|----------|----------|----------|----------|----------|----------|----------|----------|----------|----------|----------|----------|----------|----------|----------|----------|----------|----------|----------|----------|----------|----------|----------|----------|----------|----------|----------|----------|-----|-----|
|                  |                     | -30          | -25      | -20      | -15      | -10      | -5       |          |          | +1       |          |          |          |          |          |          |          |          |          |          |          |          |          |          |          |          |          |          |          |          |          |          |          |     |     |
| <b>AtbZIP12</b>  | <b>DPBF4</b>        | <b>K</b>     | <b>T</b> | <b>V</b> | <b>E</b> | <b>R</b> | <b>R</b> | <b>Q</b> | <b>R</b> | <b>M</b> | <b>I</b> | <b>K</b> | <b>N</b> | <b>R</b> | <b>S</b> | <b>A</b> | <b>A</b> | <b>R</b> | <b>S</b> | <b>R</b> | <b>A</b> | <b>R</b> | <b>K</b> | <b>K</b> | <b>A</b> | <b>I</b> | <b>T</b> | <b>H</b> | <b>E</b> | <b>L</b> | <b>A</b> |          |          |     |     |
| <b>Os bZIP66</b> | <b>TRAB1</b>        | <b>K</b>     | <b>V</b> | <b>V</b> | <b>E</b> | <b>R</b> | <b>R</b> | <b>Q</b> | <b>R</b> | <b>R</b> | <b>M</b> | <b>I</b> | <b>K</b> | <b>N</b> | <b>R</b> | <b>S</b> | <b>A</b> | <b>A</b> | <b>R</b> | <b>S</b> | <b>R</b> | <b>A</b> | <b>R</b> | <b>K</b> | <b>K</b> | <b>A</b> | <b>I</b> | <b>T</b> | <b>H</b> | <b>E</b> |          | <b>L</b> |          |     |     |
| ZmbZIP14         |                     | K            | V        | V        | E        | R        | R        | Q        | R        | R        | M        | I        | K        | N        | R        | S        | A        | A        | R        | S        | R        | A        | R        | K        | K        | A        | I        | T        | H        | E        |          | L        |          |     |     |
| ZmbZIP23         | <b>ZmbZIP72</b>     | K            | V        | V        | E        | R        | R        | R        | R        | R        | R        | R        | M        | I        | K        | N        | R        | S        | A        | A        | R        | S        | R        | A        | R        | K        | K        | A        | I        | T        |          | H        | E        | L   |     |
| ZmbZIP37.1       |                     | R            | A        | A        | M        | Q        | R        | Q        | K        | R        | M        | I        | K        | N        | R        | S        | A        | A        | R        | S        | R        | E        | R        | R        | K        | K        | A        | I        | A        | E        |          | L        |          |     |     |
| ZmbZIP37.2       |                     | R            | A        | A        | M        | Q        | R        | Q        | K        | R        | M        | I        | K        | N        | R        | S        | A        | A        | R        | S        | R        | E        | R        | R        | K        | K        | A        | I        | A        | E        |          | L        |          |     |     |
| ZmbZIP39         |                     | K            | L        | V        | E        | R        | R        | Q        | K        | R        | M        | I        | K        | N        | R        | S        | A        | A        | R        | S        | R        | A        | R        | K        | K        | A        | I        | T        | H        | E        |          | L        |          |     |     |
| ZmbZIP46.1       |                     | K            | V        | V        | E        | R        | R        | Q        | K        | R        | M        | I        | K        | N        | R        | S        | A        | A        | R        | S        | R        | A        | R        | K        | K        | A        | I        | T        | H        | E        |          | L        |          |     |     |
| ZmbZIP46.2       |                     | K            | V        | V        | E        | R        | R        | Q        | K        | R        | M        | I        | K        | N        | R        | S        | A        | A        | R        | S        | R        | A        | R        | K        | K        | A        | I        | T        | H        | E        |          | L        |          |     |     |
| ZmbZIP71         |                     | R            | A        | V        | M        | Q        | R        | Q        | K        | R        | M        | I        | K        | N        | R        | S        | A        | A        | S        | R        | S        | R        | D        | R        | K        | K        | A        | A        | L        | E        |          | E        | I        |     |     |
| ZmbZIP73         |                     | Y            | D        | D        | E        | R        | R        | K        | N        | I        | R        | M        | M        | N        | R        | S        | A        | L        | R        | S        | R        | A        | R        | K        | R        | A        | I        | V        | Q        | E        |          | L        |          |     |     |
| ZmbZIP75         |                     | S            | G        | D        | D        | R        | R        | S        | I        | R        | M        | M        | N        | R        | S        | A        | L        | R        | S        | R        | A        | R        | K        | R        | A        | I        | V        | Q        | E        | L        |          |          |          |     |     |
| ZmbZIP81.1       |                     | R            | A        | V        | M        | Q        | R        | Q        | K        | R        | M        | I        | K        | N        | R        | S        | A        | A        | R        | S        | R        | E        | R        | R        | K        | K        | A        | I        | A        | E        |          | L        |          |     |     |
| ZmbZIP81.2       |                     | R            | A        | V        | M        | Q        | R        | Q        | K        | R        | M        | I        | K        | N        | R        | S        | A        | A        | R        | S        | R        | E        | R        | R        | K        | K        | A        | I        | A        | E        |          | L        |          |     |     |
| ZmbZIP94         |                     | R            | T        | V        | E        | R        | R        | Q        | K        | R        | M        | I        | K        | N        | R        | S        | A        | A        | R        | S        | R        | A        | R        | K        | K        | A        | I        | T        | H        | E        |          | L        |          |     |     |
| ZmbZIP95         | <b>DFL1</b>         | G            | G        | T        | D        | R        | R        | K        | K        | R        | M        | I        | K        | N        | R        | S        | A        | A        | R        | S        | A        | R        | K        | K        | A        | I        | V        | R        | E        | L        |          |          |          |     |     |
| ZmbZIP98         |                     | R            | A        | V        | M        | Q        | R        | Q        | K        | R        | M        | I        | K        | N        | R        | S        | A        | A        | R        | S        | R        | E        | R        | R        | K        | K        | A        | I        | V        | A        | E        | L        |          |     |     |
| ZmbZIP99         |                     | K            | V        | V        | E        | R        | R        | Q        | K        | R        | M        | I        | K        | N        | R        | S        | A        | A        | R        | S        | R        | A        | R        | K        | K        | A        | I        | T        | H        | E        | L        |          |          |     |     |
| ZmbZIP102        |                     | R            | S        | A        | I        | Q        | R        | E        | K        | R        | M        | I        | K        | N        | R        | S        | A        | A        | R        | S        | R        | E        | R        | R        | K        | K        | A        | I        | A        | E        | L        |          |          |     |     |
| ZmbZIP104        |                     | K            | T        | V        | E        | R        | R        | Q        | K        | R        | M        | I        | K        | N        | R        | S        | A        | A        | R        | S        | R        | A        | R        | K        | K        | A        | I        | T        | H        | E        | L        |          |          |     |     |
| ZmbZIP107        |                     | K            | V        | V        | E        | R        | R        | Q        | K        | R        | M        | I        | K        | N        | R        | S        | A        | A        | R        | S        | R        | A        | R        | K        | K        | A        | I        | T        | H        | E        | L        |          |          |     |     |
| <b>AtbZIP17</b>  |                     | <b>E</b>     | <b>E</b> | <b>D</b> | <b>E</b> | <b>K</b> | <b>K</b> | <b>R</b> | <b>A</b> | <b>R</b> | <b>A</b> | <b>L</b> | <b>M</b> | <b>R</b> | <b>N</b> | <b>R</b> | <b>S</b> | <b>A</b> | <b>Q</b> | <b>L</b> | <b>S</b> | <b>R</b> | <b>Q</b> | <b>R</b> | <b>K</b> | <b>K</b> | <b>H</b> | <b>V</b> | <b>E</b> | <b>E</b> | <b>L</b> | <b>B</b> |          |     |     |
| <b>Os bZIP50</b> |                     | <b>D</b>     | <b>P</b> | <b>M</b> | <b>S</b> | <b>K</b> | <b>K</b> | <b>K</b> | <b>R</b> | <b>F</b> | <b>Q</b> | <b>M</b> | <b>R</b> | <b>N</b> | <b>R</b> | <b>D</b> | <b>S</b> | <b>A</b> | <b>M</b> | <b>K</b> | <b>S</b> | <b>R</b> | <b>E</b> | <b>R</b> | <b>K</b> | <b>K</b> | <b>M</b> | <b>V</b> | <b>K</b> | <b>D</b> | <b>L</b> |          |          |     |     |
| ZmbZIP28         |                     | E            | D        | E        | A        | K        | R        | R        | A        | R        | A        | F        | Q        | V        | R        | N        | R        | S        | A        | H        | L        | S        | R        | Q        | R        | K        | K        | Q        | Y        | V        | E        |          | L        |     |     |
| ZmbZIP79.1       |                     | E            | E        | D        | K        | R        | R        | T        | A        | R        | L        | M        | R        | N        | R        | S        | A        | Q        | L        | S        | R        | Q        | R        | K        | K        | R        | Y        | V        | E        | L        |          |          |          |     |     |
| ZmbZIP79.2       |                     | E            | E        | D        | K        | R        | R        | T        | A        | R        | L        | M        | R        | N        | R        | S        | A        | Q        | L        | S        | R        | Q        | R        | K        | K        | R        | Y        | V        | E        | L        |          |          |          |     |     |
| ZmbZIP110.1      |                     | D            | P        | I        | S        | K        | K        | K        | M        | F        | Q        | M        | R        | N        | R        | D        | S        | A        | M        | K        | S        | R        | E        | R        | K        | K        | S        | Y        | I        | K        | D        | L        |          |     |     |
| ZmbZIP110.2      |                     | D            | P        | I        | S        | K        | K        | K        | M        | F        | Q        | M        | R        | N        | R        | D        | S        | A        | M        | K        | S        | R        | E        | R        | K        | K        | S        | Y        | I        | K        | D        | L        |          |     |     |
| <b>AtbZIP9</b>   | <b>BZO2H2</b>       | <b>P</b>     | <b>N</b> | <b>D</b> | <b>L</b> | <b>K</b> | <b>R</b> | <b>I</b> | <b>F</b> | <b>R</b> | <b>F</b> | <b>M</b> | <b>S</b> | <b>N</b> | <b>R</b> | <b>S</b> | <b>A</b> | <b>S</b> | <b>A</b> | <b>R</b> | <b>S</b> | <b>R</b> | <b>R</b> | <b>K</b> | <b>K</b> | <b>Q</b> | <b>E</b> | <b>Y</b> | <b>L</b> | <b>V</b> | <b>D</b> | <b>L</b> | <b>C</b> |     |     |
| <b>Os bZIP33</b> | <b>REB</b>          | <b>P</b>     | <b>A</b> | <b>D</b> | <b>Q</b> | <b>L</b> | <b>Q</b> | <b>R</b> | <b>F</b> | <b>F</b> | <b>K</b> | <b>C</b> | <b>S</b> | <b>N</b> | <b>R</b> | <b>S</b> | <b>A</b> | <b>R</b> | <b>S</b> | <b>R</b> | <b>S</b> | <b>R</b> | <b>K</b> | <b>K</b> | <b>A</b> | <b>A</b> | <b>H</b> | <b>L</b> | <b>N</b> | <b>E</b> | <b>L</b> |          |          |     |     |
| ZmbZIP9.1        |                     | P            | A        | N        | A        | K        | M        | R        | F        | M        | V        | S        | N        | R        | S        | A        | R        | S        | R        | K        | R        | K        | Q        | A        | H        | L        | T        | D        | L        |          |          |          |          |     |     |
| ZmbZIP9.2        |                     | P            | A        | N        | A        | K        | M        | R        | F        | M        | V        | S        | N        | R        | S        | A        | R        | S        | R        | K        | R        | K        | Q        | A        | H        | L        | T        | D        | L        |          |          |          |          |     |     |
| ZmbZIP9.3        |                     | ---          | ---      | ---      | ---      | ---      | ---      | ---      | ---      | ---      | ---      | ---      | ---      | ---      | ---      | ---      | ---      | ---      | ---      | ---      | ---      | ---      | ---      | ---      | ---      | ---      | ---      | ---      | ---      | ---      | ---      | ---      |          | --- | --- |
| ZmbZIP9.4        |                     | P            | A        | N        | A        | K        | M        | R        | F        | M        | V        | S        | N        | R        | S        | A        | R        | S        | R        | K        | R        | K        | Q        | A        | H        | L        | T        | D        | L        |          |          |          |          |     |     |
| ZmbZIP16.1       |                     | P            | V        | Q        | H        | L        | Q        | R        | F        | K        | C        | S        | N        | R        | S        | A        | R        | S        | R        | S        | R        | K        | A        | A        | H        | L        | N        | E        | L        |          |          |          |          |     |     |
| ZmbZIP16.2       |                     | P            | V        | Q        | H        | L        | Q        | R        | F        | K        | C        | S        | N        | R        | S        | A        | R        | S        | R        | S        | R        | K        | A        | A        | H        | L        | N        | E        | L        |          |          |          |          |     |     |
| ZmbZIP17         | <b>OHP1</b>         | P            | V        | Q        | R        | L        | Q        | R        | F        | K        | C        | S        | N        | R        | S        | A        | R        | S        | R        | S        | R        | K        | A        | A        | H        | L        | N        | E        | L        |          |          |          |          |     |     |
| ZmbZIP60.1       | <b>OHP2</b>         | P            | V        | Q        | R        | Q        | R        | F        | K        | C        | S        | N        | R        | S        | A        | R        | S        | R        | S        | R        | K        | A        | A        | H        | L        | N        | E        | L        |          |          |          |          |          |     |     |
| ZmbZIP60.2       |                     | P            | V        | Q        | R        | Q        | R        | F        | K        | C        | S        | N        | R        | S        | A        | R        | S        | R        | S        | R        | K        | A        | A        | H        | L        | N        | E        | L        |          |          |          |          |          |     |     |
| ZmbZIP65.1       |                     | P            | Q        | D        | V        | K        | R        | M        | R        | F        | M        | V        | S        | N        | R        | S        | A        | R        | S        | R        | K        | Q        | A        | H        | L        | A        | D        | L        |          |          |          |          |          |     |     |
| ZmbZIP65.2       |                     | ---          | ---      | ---      | ---      | ---      | ---      | ---      | ---      | ---      | ---      | ---      | ---      | ---      | ---      | ---      | ---      | ---      | ---      | ---      | ---      | ---      | ---      | ---      | ---      | ---      | ---      | ---      | ---      | ---      | ---      | ---      |          | --- | --- |
| ZmbZIP85.1       | <b>Opaque2</b>      | P            | T        | E        | E        | R        | V        | R        | K        | R        | K        | E        | S        | N        | R        | S        | A        | R        | S        | F        | Y        | R        | K        | A        | A        | H        | L        | K        | E        | L        |          |          |          |     |     |
| ZmbZIP85.2       |                     | P            | T        | E        | E        | R        | V        | R        | K        | R        | K        | E        | S        | N        | R        | S        | A        | R        | S        | F        | Y        | R        | K        | A        | A        | H        | L        | K        | E        | L        |          |          |          |     |     |
| ZmbZIP85.3       |                     | P            | T        | E        | E        | R        | V        | R        | K        | R        | K        | E        | S        | N        | R        | S        | A        | R        | S        | F        | Y        | R        | K        | A        | A        | H        | L        | K        | E        | L        |          |          |          |     |     |
| ZmbZIP112.1      |                     | S            | I        | E        | T        | K        | R        | I        | R        | M        | V        | S        | N        | R        | S        | A        | R        | S        | F        | R        | K        | Q        | A        | C        | L        | S        | D        | L        |          |          |          |          |          |     |     |
| ZmbZIP112.2      |                     | S            | I        | E        | T        | K        | R        | I        | R        | M        | V        | S        | N        | R        | S        | A        | R        | S        | F        | R        | K        | Q        | A        | C        | L        | S        | D        | L        |          |          |          |          |          |     |     |
| <b>AtbZIP20</b>  | <b>AHBP-1b/TGA2</b> | <b>K</b>     | <b>M</b> | <b>D</b> | <b>Q</b> | <b>K</b> | <b>T</b> | <b>L</b> | <b>R</b> | <b>R</b> | <b>L</b> | <b>A</b> | <b>Q</b> | <b>N</b> | <b>R</b> | <b>E</b> | <b>A</b> | <b>A</b> | <b>R</b> | <b>K</b> | <b>S</b> | <b>R</b> | <b>I</b> | <b>R</b> | <b>K</b> | <b>K</b> | <b>A</b> | <b>V</b> | <b>Q</b> | <b>L</b> | <b>D</b> |          |          |     |     |
| <b>Os bZIP11</b> |                     | <b>S</b>     | <b>V</b> | <b>D</b> | <b>A</b> | <b>K</b> | <b>T</b> | <b>E</b> | <b>R</b> | <b>R</b> | <b>L</b> | <b>A</b> | <b>Q</b> | <b>N</b> | <b>R</b> | <b>E</b> | <b>A</b> | <b>A</b> | <b>R</b> | <b>K</b> | <b>S</b> | <b>R</b> | <b>I</b> | <b>R</b> | <b>K</b> | <b>K</b> | <b>A</b> | <b>V</b> | <b>Q</b> | <b>N</b> |          | <b>L</b> |          |     |     |
| ZmbZIP4          |                     | P            | M        | D        | Q        | K        | V        | L        | R        | R        | L        | A        | Q        | N        | R        | E        | A        | A        | R        | K        | S        | R        | I        | R        | K        | K        | A        | I        | Y        | Q        |          | L        |          |     |     |
| ZmbZIP18.1       |                     | E            | R        | V        | T        | V        | M        | R        | R        | L        | A        | Q        | N        | R        | E        | A        | A        | R        | K        | S        | R        | I        | R        | K        | K        | A        | I        | Y        | Q        | L        |          |          |          |     |     |
| ZmbZIP18.2       |                     | ---          | ---      | ---      | ---      | ---      | ---      | ---      | ---      | ---      | ---      | ---      | ---      | ---      | ---      | ---      | ---      | ---      | ---      | ---      | ---      | ---      | ---      | ---      | ---      | ---      | ---      | ---      | ---      | ---      |          | ---      | ---      | --- | --- |
| ZmbZIP18.3       |                     | R            | P        | P        | E        | R        | V        | M        | R        | R        | L        | A        | Q        | N        | R        | E        | A        | A        | R        | K        | S        | R        | I        | R        | K        | K        | A        | I        | Y        | Q        |          | L        |          |     |     |
| ZmbZIP25         |                     | E            | R        | D        | P        | K        | T        | L        | R        | R        | L        | A        | Q        | N        | R        | E        | A        | A        | R        | K        | S        | R        | I        | R        | K        | K        | A        | I        | Y        | Q        |          | L        |          |     |     |
| ZmbZIP38.1       | <b>LG2</b>          | L            | V        | D        | A        | K        | T        | E        | R        | R        | L        | A        | Q        | N        | R        | E        | A        | A        | R        | K        | S        | R        | I        | R        | K        | K        | A        | I        | Y        | Q        |          | L        |          |     |     |
| ZmbZIP38.2       |                     | L            | V        | D        | A        | K        | T        | E        | R        | R        | L        | A        | Q        | N        | R        | E        | A        | A        | R        | K        | S        | R        | I        | R        | K        | K        | A        | I        | Y        | Q        |          | L        |          |     |     |
| ZmbZIP40.1       | <b>OBF3.1</b>       | K            | L        | D        | Q        | K        | T        | L        | R        | R        | L        | A        | Q        | N        | R        | E        | A        | A        | R        | K        | S        | R        | I        | R        | K        | K        | A        | I        | Q        | N        |          | L        |          |     |     |
| ZmbZIP40.2       |                     | K            | L        | D        | Q        | K        | T        | L        | R        | R        | L        | A        | Q        | N        | R        | E        | A        | A        | R        | K        | S        | R        | I        | R        | K        | K        | A        | I        | Q        | N        |          | L        |          |     |     |
| ZmbZIP48         |                     | T            | V        | H        | I        | S        | H        | G        | A        | A        | Y        | N        | R        | E        | A        | A        | R        | K        | S        | L        | I        | R        | K        | K        | A        | I        | Y        | Q        | L        |          |          |          |          |     |     |
| ZmbZIP50         |                     | A            | L        | D        | P        | K        | V        | I        | R        | R        | L        | A        | Q        | N        | R        | E        | A        | A        | R        | K        | S        | R        | I        | R        | K        | K        | A        | I        | Y        | Q        |          | L        |          |     |     |
| ZmbZIP68         |                     | T            | S        | D        | A        | K        | T        | L        | R        | R        | L        | A        | Q        | N        | R        | E        | A        | A        | R        | K        | S        | R        | I        | R        | K        | K        | A        | I        | Q        | N        |          | L        |          |     |     |
| ZmbZIP77.1       |                     | P            | R        | D        | H        | K        | A        | Q        | R        | R        | L        | A        | Q        | N        | R        | E        | A        | A        | R        | K        | S        | R        | M        | R        | K        | K        | A        | I        | V        | E        |          | L        |          |     |     |
| ZmbZIP77.2       |                     | P            | R        | D        | H        | K        | A        | Q        | R        | R        | L        | A        | Q        | N        | R        | E        | A        | A        | R        | K        | S        | R        | M        | R        | K        | K        | A        | I        | V        | E        | L        |          |          |     |     |
| ZmbZIP77.3       |                     | P            | R        | D        | H        | K        | A        |          |          |          |          |          |          |          |          |          |          |          |          |          |          |          |          |          |          |          |          |          |          |          |          |          |          |     |     |
