# Supplementary material for: Genome-Wide Analysis of bZIP-Encoding Genes in Maize
Source: PubMed Central journal article supplement — DNA Res. 2012 Oct 26;19(6):463–76. doi: 10.1093/dnares/dss026 (PMC3514857; doi:10.1093/dnares/dss026), 2012-10-26
Supplement: supp_dss026_dss026supp_fig7.pdf [file supp_dss026_dss026supp_fig7.pdf]

**Supplemental Figure S7. Amino acid sequence alignment of the leucine zipper region of 170 ZmbZIP proteins.**

The ZmbZIP proteins are categorized into 26 sub-families (BZ1-BZ26) with similar predicted dimerization properties. The leucine zipper region is divided into heptads (*gabcdef*) from L0 to L9 to visualize the potential *g* ↔ *e'* pairs. Four colors are used to differentiate between different *g* ↔ *e'* pairs. Attractive basic-acidic pairs (R ↔ E and K ↔ E) are colored orange, attractive acidic-basic pairs (E ↔ R, E ↔ K, D ↔ R, and D ↔ K) are blue, repulsive basic pairs (K ↔ K, R ↔ K, R ↔ Q, Q ↔ K, and K ↔ Q) are pink and repulsive acidic pairs (E ↔ E, E ↔ D, E ↔ Q, and Q ↔ E) are green. If single amino acid at the positions *e* or *g* is charged, the residue is colored pink for basic amino acid and green for acidic amino acid. If the *a* or *d* position is charged, it is colored brown. Asparagines at *a* position are colored red. The prolines and glycines are bold to indicate a potential break in the  $\alpha$ -helix. The predicted C-terminal boundary is denoted by the symbol \*, other than the natural terminals which are indicated by the symbol ^.

| Sub-family | ZmbZIP NO.  | Leucine zipper region |          |          |          |          |           |          |           |          |          |         |
|------------|-------------|-----------------------|----------|----------|----------|----------|-----------|----------|-----------|----------|----------|---------|
|            |             | L0                    | L1       | L2       | L3       | L4       | L5        | L6       | L7        | L8       | L9       |         |
| BZ1        | ZmbZIP39    | gabcdef               | gabcdef  | gabcdef  | gabcdef  | gabcdef  | gabcdef   | gabcdef  | gabcdef   | gabcdef  | gabcdef  | gabcdef |
|            | ZmbZIP94    | YTFELEN               | KVSRLEE  | ENKLLT*  | LKELENI  | LFSEPLP  | EPKYQLR   | RTGSATF  |           |          |          |         |
|            | ZmbZIP99    | YTFELEN               | KVSRLEE  | ENKRLIE* | LKVLKPL  | EPLEPPP  | AEQNKQK   | PPQPKR   | KQPQPPP   | PPPPPQI  | QLPPKHR  |         |
| BZ2        | ZmbZIP14    | YTFELEN               | EVQKLKE  | QNEELQK  | KQEEME*  | MQKNQV   | EVISNPF   | AQKRCRL  | RRTLTGP   | W        |          |         |
|            | ZmbZIP23    | YTFELEN               | EVQKLKE  | QNEELQK  | KQAEIME* | MQNNEVS  | EMLKDPF   | GRKKRLC  | LRRTLTA   | PW       |          |         |
|            | ZmbZIP46.1  | YTFELEN               | EVQKLKE  | QNAELQK  | KQVPELV* | SNPYAQK  | KRCLRRT   | LTGWP    |           |          |          |         |
|            | ZmbZIP46.2  | YTFELEN               | EVQKLKE  | QNAELQK  | KQEIQME* | MQQNQVP  | ELVSNPY   | AQKRCRL  | RRTLTGP   | W        |          |         |
| BZ3        | ZmbZIP107   | YTFELEN               | EVAKLKD  | QNAELQK  | KQVEMLK* | KQKDEVL  | ERINSQH   | GPKAKKL  | CLRRLT    | GPW      |          |         |
|            | ZmbZIP31    | YLTELEA               | KAKGLEL  | RNAELQK  | RVSTLQK  | ENNTLRQ  | ILKNNTA*  | HASKRSG  | GGGGGGG   | KGGDGGK  | KHHLAKS  |         |
|            | ZmbZIP67    | YLTDLEV               | KVRDLLEK | RNSMEME  | RLSTLQK  | ENQMLRQ  | ILKNNTAV* | NRRKSGS  | TASGEGH   | GQ       |          |         |
|            | ZmbZIP97.1  | YLTELEA               | RAKDLLEL | RNAELQK  | RVSTLQK  | ENNTLRQ  | ILKNNTA*  | HASKRSG  | GGGGGGG   | GGKHHF   | AKS      |         |
| BZ4        | ZmbZIP10.1  | YKIDLET               | KSKHLEA  | ECRRLSY  | ALQCYAA  | ENMALRQ* | SLKDRP    | LGAPTAT  | QESAVLT   | ETLPLVS  | LLWLVS1  |         |
|            | ZmbZIP10.2  | YKIDLET               | KSKHLEA  | ECRRLSY  | ALQCYAA  | ENMALRQ* | SLKDRP    | LGAPTAT  | QESAVLT   | ETLPLVS  | LLWLVS1  |         |
|            | ZmbZIP73    | YVQLEK                | EVRRLVN  | ENLKLK   | QCKQLK   | DMAALVQ* | QSSSKSS   | SHIRRTS  | SSTQL     |          |          |         |
|            | ZmbZIP75    | YVQLEK                | EVRRLVN  | ENLKLK   | QCKQLK   | DMAALVQ* | QSSSKSS   | SHIRRTS  | SSTQL     |          |          |         |
| BZ5        | ZmbZIP95    | YVRELET               | KVQLLQK  | ENESLRV  | KYDELRE* | SVEVAVP  | MVRKTLQ   | RMPSAFP  |           |          |          |         |
|            | ZmbZIP28    | YVEELEG               | KVKAMQA  | TIADLSA  | RISCVTA  | ENAAKQ*  | QLGGAAG   | AAPPPMP  | MYPTMYS   | LMPWPMH  | PSYPMRG  |         |
|            | ZmbZIP79.1  | YVEELEE               | KVKSMHS  | VINDLSC  | KISFIAA  | ENATLRQ* | QLGGVGV   | SGPPPGV  | YPPPPPG   | IHPFVWS  | GYAMRPH  |         |
|            | ZmbZIP79.2  | YVEELEE               | KVKSMHS  | VINDLSC  | KISFIAA  | ENATLRQ* | QLGGVGV   | SGPPPGV  | YPPPPPG   | IHPFVWS  | GYAMRPH  |         |
| BZ7        | ZmbZIP32    | EETEELAT              | QVESLAA  | ENTSLRS  | EIGRLTE  | SSEKLR   | ENALMV    | KLKDTAE* | PSPSKAA   | ASPPSR   | ASAENFL  |         |
|            | ZmbZIP43    | EETEELAR              | QVESLAA  | ENTSLRS  | EIGRLTE  | SSEKLR   | ENALMV    | KLKDTAE* | PSPSKAA   | ASPPSR   | ASAENFL  |         |
|            | ZmbZIP83.2  | EETEELAT              | QVESLAA  | ENTSLRS  | EIGRLTE  | SSEKLR   | ENALMV    | KLKDTAE* | PSPSKAA   | ASPPSR   | ASAENFL  |         |
|            | ZmbZIP42    | EETEELAT              | QVESLAA  | ENTSLRS  | EIGRLTE  | SSEKLR   | ENALMV    | KLKDTAE* | PSPSKAA   | ASPPSR   | ASAENFL  |         |
| BZ8        | ZmbZIP124   | EETEELAT              | QVESLAA  | ENTSLRS  | EIGRLTE  | SSEKLR   | ENALMV    | KLKDTAE* | PSPSKAA   | ASPPSR   | ASAENFL  |         |
|            | ZmbZIP33    | ECEELAQ               | RAEVLKQ  | ENASLRD  | EVNRIK   | EYELLS   | KNSLKE*   | KLEGKQH  | KTDEAGL   | NNKLQHS  | GNDIQKK  |         |
|            | ZmbZIP58    | ECEELGQ               | RAEVLKQ  | ENASLRD  | EVNRIK   | EYELLS   | KNSLKE*   | KLEGKQH  | KTDEAGL   | NNKLQHS  | GNDIQKK  |         |
|            | ZmbZIP63    | ECEELGQ               | RAEVLKQ  | ENASLRD  | EVNRIK   | EYELLS   | KNSLKE*   | KLEGKQH  | KTDEAGL   | NNKLQHS  | GNDIQKK  |         |
| BZ9        | ZmbZIP20    | ECEELAQ               | RAEVLKQ  | ENASLRD  | EVNRIK   | EYELLS   | KNSLKE*   | KLEGKQH  | KTDEAGL   | NNKLQHS  | GNDIQKK  |         |
|            | ZmbZIP2     | EWEEVAN               | RADLLKQ  | ENSSLKE  | ELKQLQE  | KCDGLTS  | ENTSLHE   | KLKALED* | EKSNGNW   | YKD      |          |         |
|            | ZmbZIP21.1  | ECEELAR               | KVADLTT  | ENSALRA  | ELDNLRK  | ACQDMEA  | ENSRLV*   | STVPSVT  | TTLGMSI   | EPKAAQ   | HHDEDEG  |         |
|            | ZmbZIP21.2  | ECEELAR               | KVADLTT  | ENSALRA  | ELDNLRK  | ACQDMEA  | ENSRLV*   | STVPSVT  | TTLGMSI   | EPKAAQ   | HHDEDEG  |         |
| BZ10       | ZmbZIP86.1  | ECEELAR               | KVADLTT  | ENSALRA  | ELDNLRK  | ACQDMEA  | ENSRLV*   | STVPSVT  | TTLGMSI   | EPKAAQ   | HHDEDEG  |         |
|            | ZmbZIP86.2  | ECEELAR               | KVADLTT  | ENSALRA  | ELDNLRK  | ACQDMEA  | ENSRLV*   | STVPSVT  | TTLGMSI   | EPKAAQ   | HHDEDEG  |         |
|            | ZmbZIP122   | ECEELAQ               | KVADLTV  | VNGMLRS  | ELDELK   | ACEDMEA  | VTSVMVK*  | TALVAMG  | SGRLTQG   | SS       |          |         |
|            | ZmbZIP51    | IRDELAR               | KVADLSS  | QENMFK   | EKDVMQ   | EYLSLKE  | ANKQLKE   | QVARTTA* | KKAPAGS   | LAAAASP  |          |         |
| BZ11       | ZmbZIP18    | VRDELAR               | KVADLSS  | QENMFK   | EKDVMQ   | EYLSLKE  | TNEQLKA   | AEQAHHH  | HHLRSLSS* | LF       |          |         |
|            | ZmbZIP11    | QLSELWA               | QVSHLRG  | ANRRLLD  | DLNRALR  | SCADAR   | ESARLRE   | EKAELTK  | KLQQLL*   | AEKGLS   | EAAEPCK  |         |
|            | ZmbZIP54    | QLSELWA               | QVSHLRG  | ANRRLLD  | DLNRALR  | SCADAR   | ESARLRE   | EKAELTK  | KLQQLL*   | AEKGLS   | EAAEPCK  |         |
|            | ZmbZIP57    | RLHELSE               | RAEELLG  | ANRLLV   | DLNRVVA  | RHGAVAR  | ENARLRE   | EKAQLAN  | RLHQLL*   | IAG      |          |         |
| BZ12       | ZmbZIP59    | HDELTA                | QAHLRR   | ENAHVAT  | ALGLTAQ  | GLLAVDA  | DNVLR     | QAEALAA  | RLGSLND*  | ILACMNT  | TNAAAAA  |         |
|            | ZmbZIP64    | HDELTA                | QAHLRR   | ENAHVAT  | ALGLTAQ  | GLLAVDA  | DNVLR     | QAEALAA  | RLGSLND*  | ILACMNT  | TNAAAAA  |         |
|            | ZmbZIP66    | RLYELSL               | QVAELG   | TNRLLV   | ELNHVTA  | KYALLAR  | ENAKLRE   | EAAGLQR  | RLSE*     | ILACMNT  | NAVGAVA  |         |
|            | ZmbZIP72    | QLSELWA               | QVSHLRG  | TNRQLD   | QLNHVTA  | DCDRVLR  | ENSLR     | EQTLLQ*  | QLEMLPV   | DTTESGA  | MSPGS    |         |
| BZ13       | ZmbZIP78    | QLGQLWD               | QVSHLRG  | DSRDLLD  | RLNRAIR  | DCDRVLR  | ENARLRN   | ERAGLQR  | RLDLIT*   | DGDDDDR  | PF       |         |
|            | ZmbZIP109   | QLDELSS               | RVAALRA  | ANARLAV  | ELSRVSA  | ARAREAR  | ENARLRA   | EAGALRE  | RLAAAEA*  | AAAAAGH  | GQVRRVP  |         |
|            | ZmbZIP10    | HLEELRG               | RAARLRA  | GNRDLAA  | RLGGAQA  | RAALARL  | ANARLRA   | EAGALAR  | RLYAAAR*  | ALALRQV  | YAASGGS  |         |
|            | ZmbZIP22    | HHDDLTS               | QVDQLK   | QNKQLNL  | ALSTTSQ  | NLVAVQA  | QNSVLQT   | QRMELAS  | RLGALTE*  | ILWCSS   | STGTAAP  |         |
| BZ14       | ZmbZIP24    | QLTELCA               | QVVALRA  | ANRRLLD  | ELNRALR  | GCSDMCC  | ENARLQK   | EKTDLST  | KLERLQ*   | AQNAATP  | SSSSEFP  |         |
|            | ZmbZIP44    | QLDDLTA               | QVAALRA  | RNGAMDA  | AARDAAR  | RCVAVQA  | ENAMLHA   | RTVELSA  | RLQSLVD*  | LIQCMQA  | GDAMYQY  |         |
|            | ZmbZIP87    | HDDLTS                | QVVALRA  | ANRRLLD  | ELNRALR  | ALNRAVR  | GCSDMR    | ENARLQK  | EKTDLST   | KLQRLTQ* | ILWYMNS  | STSTSTA |
|            | ZmbZIP88    | QLTELWA               | QVVALRA  | ANRRLLD  | ELNRALR  | ALNRAVR  | GCSDMR    | ENARLQK  | EKTDLST   | KLQRLTQ* | PQNAALP  | SSSSEFP |
| BZ15       | ZmbZIP49    | QLSELWA               | QVVALRA  | ANRRLLD  | ELNRALR  | ALNRAVR  | GCSDMR    | ENARLQK  | EKTDLST   | KLQRLTQ* | PQNAALP  | SSSSEFP |
|            | ZmbZIP8     | HDELVQ                | EVARLQA  | DNARVGA  | RAADIAS  | QYTRVQ   | ENTVLR    | RAAELGD  | RLRSVNE   | VLRVVEE* | FSGVAMD  |         |
|            | ZmbZIP34    | HDELVQ                | EVARLQA  | DNARVGA  | RAADIAS  | QYTRVQ   | ENTVLR    | RAAELGD  | RLRSVNE   | VLRVVEE* | FSGVAMD  |         |
|            | ZmbZIP61    | RLHELSE               | RAEELLG  | ANRLLV   | DLNRVVA  | RHGAVAR  | ENARLRE   | EKAQLAN  | RLHQLL*   | IAG      |          |         |
| BZ16       | ZmbZIP74    | RLHELSE               | RAEELLG  | ANRLLV   | DLNRVVA  | RHGAVAR  | ENARLRE   | EKAQLAN  | RLHQLL*   | IAG      |          |         |
|            | ZmbZIP3     | HVDLDA                | EAERLRR  | ENAMRA   | GVGDVAV  | RSRALQ   | ENRVLAA   | HARQLCA  | ALLLRNS   | QLSLLD*  | VAGVPLD  |         |
|            | ZmbZIP15    | HVDLDA                | EAERLRR  | ENAMRA   | GVGDVAV  | RSRALQ   | ENRVLAA   | HARQLCA  | ALLLRNS   | QLSLLD*  | VAGVPLD  |         |
|            | ZmbZIP104   | YTVELEA               | ELNHLKE  | ENERLRA  | EERTILL* | SKKKMLV  | EKMMEQA   | RENVSAS  | TILLRNS   | QLRLLD*  | VAGVPLD  |         |
| BZ17       | ZmbZIP12.1  | QLSDLES               | QVERLKG  | ENATLFQ  | QLSDANQ  | QFSTAVT  | DNRLKS    | DVEALRI  | KVKMAED*  | MVARSAV  | SCGLGDL  |         |
|            | ZmbZIP12.2  | QLSDLES               | QVERLKG  | ENATLFQ  | QLSDANQ  | QFSTAVT  | DNRLKS    | DVEALRI  | KVKMAED*  | MVARSAV  | SCGLGDL  |         |
|            | ZmbZIP65.1  | HLADLET               | QVDQLK   | ENASLFK  | QLTDANQ  | QFTTAVT  | DNRLKS    | DVEALRV  | KVKLAED*  | MVARGAL  | SCGLGSL  |         |
|            | ZmbZIP65.2  | HLADLET               | QVDQLK   | ENASLFK  | QLTDANQ  | QFTTAVT  | DNRLKS    | DVEALRV  | KVKLAED*  | MVARGAL  | SCGLGSL  |         |
| BZ18       | ZmbZIP9.1   | HLDLDES               | QVSRLLS  | ENASLLK  | RLADMTQ  | KYKDVAV  | DNKNLTV   | DVETMR   | KVRSS*    | AVRRLTG* | ITLMLPT  |         |
|            | ZmbZIP9.2   | HLDLDES               | QVSRLLS  | ENASLLK  | RLADMTQ  | KYKDVAV  | DNKNLTV   | DVETMR   | KVRSS*    | AVRRLTG* | ITLMLPT  |         |
|            | ZmbZIP9.3   | HLDLDES               | QVSRLLS  | ENASLLK  | RLADMTQ  | KYKDVAV  | DNKNLTV   | DVETMR   | KVRSS*    | AVRRLTG* | ITLMLPT  |         |
|            | ZmbZIP9.4   | HLDLDES               | QVSRLLS  | ENASLLK  | RLADMTQ  | KYKDVAV  | DNKNLTV   | DVETMR   | KVRSS*    | AVRRLTG* | ITLMLPT  |         |
| BZ19       | ZmbZIP16.1  | HLNELEA               | QVQQLRV  | ENSSLIR  | RLADVNO  | KFNEAAV  | DNRVLKA   | DVETLRA  | KVKMAED   | SVKRVTG* | MNTLPPA  |         |
|            | ZmbZIP16.2  | HLNELEA               | QVQQLRV  | ENSSLIR  | RLADVNO  | KFNEAAV  | DNRVLKA   | DVETLRA  | KVKMAED   | SVKRVTG* | MNTLPPA  |         |
|            | ZmbZIP17    | HLNELEA               | QVQQLRV  | ENSSLIR  | RLADVNO  | KFNEAAV  | DNRVLKA   | DVETLRA  | KVKMAED   | SVKRVTG* | MNTLPPA  |         |
|            | ZmbZIP60.1  | HLNELEA               | QVQQLRV  | ENSSLIR  | RLADVNO  | KFNEAAV  | DNRVLKA   | DVETLRA  | KVKMAED   | SVKRVTG* | MNTLPPA  |         |
| BZ20       | ZmbZIP60.2  | HLNELEA               | QVQQLRV  | ENSSLIR  | RLADVNO  | KFNEAAV  | DNRVLKA   | DVETLRA  | KVKMAED   | SVKRVTG* | MNTLPPA  |         |
|            | ZmbZIP85.1  | HLKELED               | QVAQLKA  | ENSCLLR  | RLAALNQ  | KYNDANV  | DNRVLRA   | DMETLRA  | KVKMGED   | SLKRVIE* | MSSVSPS  |         |
|            | ZmbZIP85.2  | HLKELED               | QVAQLKA  | ENSCLLR  | RLAALNQ  | KYNDANV  | DNRVLRA   | DMETLRA  | KVKMGED   | SLKRVIE* | MSSVSPS  |         |
|            | ZmbZIP85.3  | HLKELED               | QVAQLKA  | ENSCLLR  | RLAALNQ  | KYNDANV  | DNRVLRA   | DMETLRA  | KVKMGED   | SLKRVIE* | MSSVSPS  |         |
| BZ21       | ZmbZIP62.1  | HTASLEE               | EVVHLRA  | LNQQLVK  | KLQSHAA  | LEAEVAR  | LRCLLVD*  | IRGRIEG  | EIGAFFY   | QRPPAA   | KNVDLVS  |         |
|            | ZmbZIP62.2  | HTASLEE               | EVVHLRA  | LNQQLVK  | KLQSHAA  | LEAEVAR  | LRCLLVD*  | IRGRIEG  | EIGAFFY   | QRPPAA   | KNVDLVS  |         |
|            | ZmbZIP76    | HTASLEE               | EVVHLRA  | LNQQLVK  | KLQSHAA  | LEAEVAR  | LRCLLVD*  | IRGRIEG  | EIGAFFY   | QRPPAA   | KNVDLVS  |         |
|            | ZmbZIP82    | HAAPLEE               | EVKKLRA  | ANQQLVR  | RLQGHAA  | LEAEVAR  | LRGLLLD   | IRGKIDA* | EVGGVLP   | FQKPCSV  | GSVACAD  |         |
| BZ22       | ZmbZIP101.1 | RAAFLEG               | EVKKLRA  | ANQQLVR  | RLQGHAA  | LEAEVAR  | LRGLLLD   | VRGRIDA* | EVGVSFP   | QRPCSG   | SVECGAD  |         |
|            | ZmbZIP101.2 | RAAFLEG               | EVKKLRA  | ANQQLVR  | RLQGHAA  | LEAEVAR  | LRGLLLD   | VRGRIDA* | EVGVSFP   | QRPCSG   | SVECGAD  |         |
|            | ZmbZIP30    | YISELER               | SVTTLQ   | EVSALSP  | RVAFLDH  | QRSLTL   | GNSHLRQ   | RIAAALQ  | DKIFKDA   | HQEALRK  | BIERLRQ* |         |
|            | ZmbZIP41    | YISELER               | SVTTLQ   | EVSALSP  | RVAFLDH  | QRSLTL   | GNSHLRQ   | RIAAALQ  | DKIFKDA   | HQEALRK  | BIERLRQ* |         |
| BZ23       | ZmbZIP56    | YISELER               | SVTTLQ   | EVSALSP  | RVAFLDH  | QRSLTL   | GNSHLRQ   | RIAAALQ  | DKIFKDA   | HQEALRK  | BIERLRQ* |         |
|            | ZmbZIP69    | YISELER               | SVTTLQ   | EVSALSP  | RVAFLDH  | QRSLTL   | GNSHLRQ   | RIAAALQ  | DKIFKDA   | HQEALRK  | BIERLRQ* |         |
|            | ZmbZIP106.1 | YISELER               | SVTTLQ   | EVSALSP  | RVAFLDH  | QRSLTL   | GNSHLRQ   | RIAAALQ  | DKIFKDA   | HQEALRK  | BIERLRQ* |         |
|            | ZmbZIP47    | YIAELER               | TVDSLQ   | IGADLAV  | RVSSLFQ  | HLNALSM  | ENKQLRI   | HISLQ    | AKLIKDG   | QTQALKN  | EAERLKQ* |         |
| BZ24       | ZmbZIP70    | YIAELER               | TVDSLQ   | IGADLAV  | RVSSLFQ  | HLNALSM  | ENKQLRI   | QBSLQR   | AKLIKDG   | QTQALKN  | EAERLKQ* |         |
|            | ZmbZIP35    | YIAELER               | RVQSLQ   | EGIEVTA  | EMDFLQ   | QNMMLD   | ENKALKQ   | RLESLQ   | EHLIKRY   | QQEMFER  | BIERLRT* |         |
|            | ZmbZIP45    | YIAELER               | RVQSLQ   | EGIEVTA  | EMDFLQ   | QNMMLD   | ENKALKQ   | RLESLQ   | EHLIKRY   | QQEMFER  | BIERLRT* |         |
|            | ZmbZIP1     | YIGELEH               | KVQILQ   | EATTLA   | QLTLLQ   | DSAGIAT  | QNNELKF   | RLQAMEQ  | QAQLRDA   | LNEALTA  | EVQRLLK* |         |
| BZ25       | ZmbZIP6     | YIAELEQ               | KVQILQ   | EATTLA   | QLTLLQ   | DSAGIAT  | QNNELKF   | RLQAMEQ  | QAQLRDA   | LNEALTA  | EVQRLLK* |         |
|            | ZmbZIP13    | YIQELEH               | KVQILQ   | EATTLA   | QLTLLQ   | DSAGIAT  | QNNELKI   | RLQAMEQ  | QAQLRDA   | LNEALTA  | EVQRLLK* |         |
|            | ZmbZIP53    | YIQELEH               | KVQILQ   | EATTLA   | QLTLLQ   | DSAGIAT  | QNNELKI   | RLQAMEQ  | QAQLRDA   | LNEALTA  | EVQRLLK* |         |
|            | ZmbZIP5     | YMTDLER               | KVQTLQ   | EATTLA   | QLTLFQ   | DTTGLST  | ENAELEK   | RLQAMEQ  | QAQLRDA   | LNDALQ   | BIERLKH* |         |
| BZ26       | ZmbZIP12    | YIAELER               | KVQFMQR  | DATALAT  | QLALLQ   | DTAGLTV  | ENSELK    | RLQSTEQ  | QIHLQDA   | LNEALKS  | BIERLKV* |         |
|            | ZmbZIP9.1   | YIAELER               | KVQTLQ   | EATTLA   | QLAMLRQ  | DTTGMTS  | ENSDKI    | RVQTMQ   | QVQLQDA   | LNDLRD   | BIERLKV* |         |
|            | ZmbZIP9.2   | YIAELER</             |          |          |          |          |           |          |           |          |          |         |
