# Supplementary material for: Genome-Wide Analysis of bZIP-Encoding Genes in Maize
Source: PubMed Central journal article supplement — DNA Res. 2012 Oct 26;19(6):463–76. doi: 10.1093/dnares/dss026 (PMC3514857; doi:10.1093/dnares/dss026), 2012-10-26

**Supplemental Figure S8.** Chromosomal distribution of *ZmbZIP* genes. Chromosomes are shown in gray bar. The colored rectangles represent *ZmbZIP* genes. Genes above chromosomes have “Watson” orientation, and genes below chromosomes have “Crick” orientation.

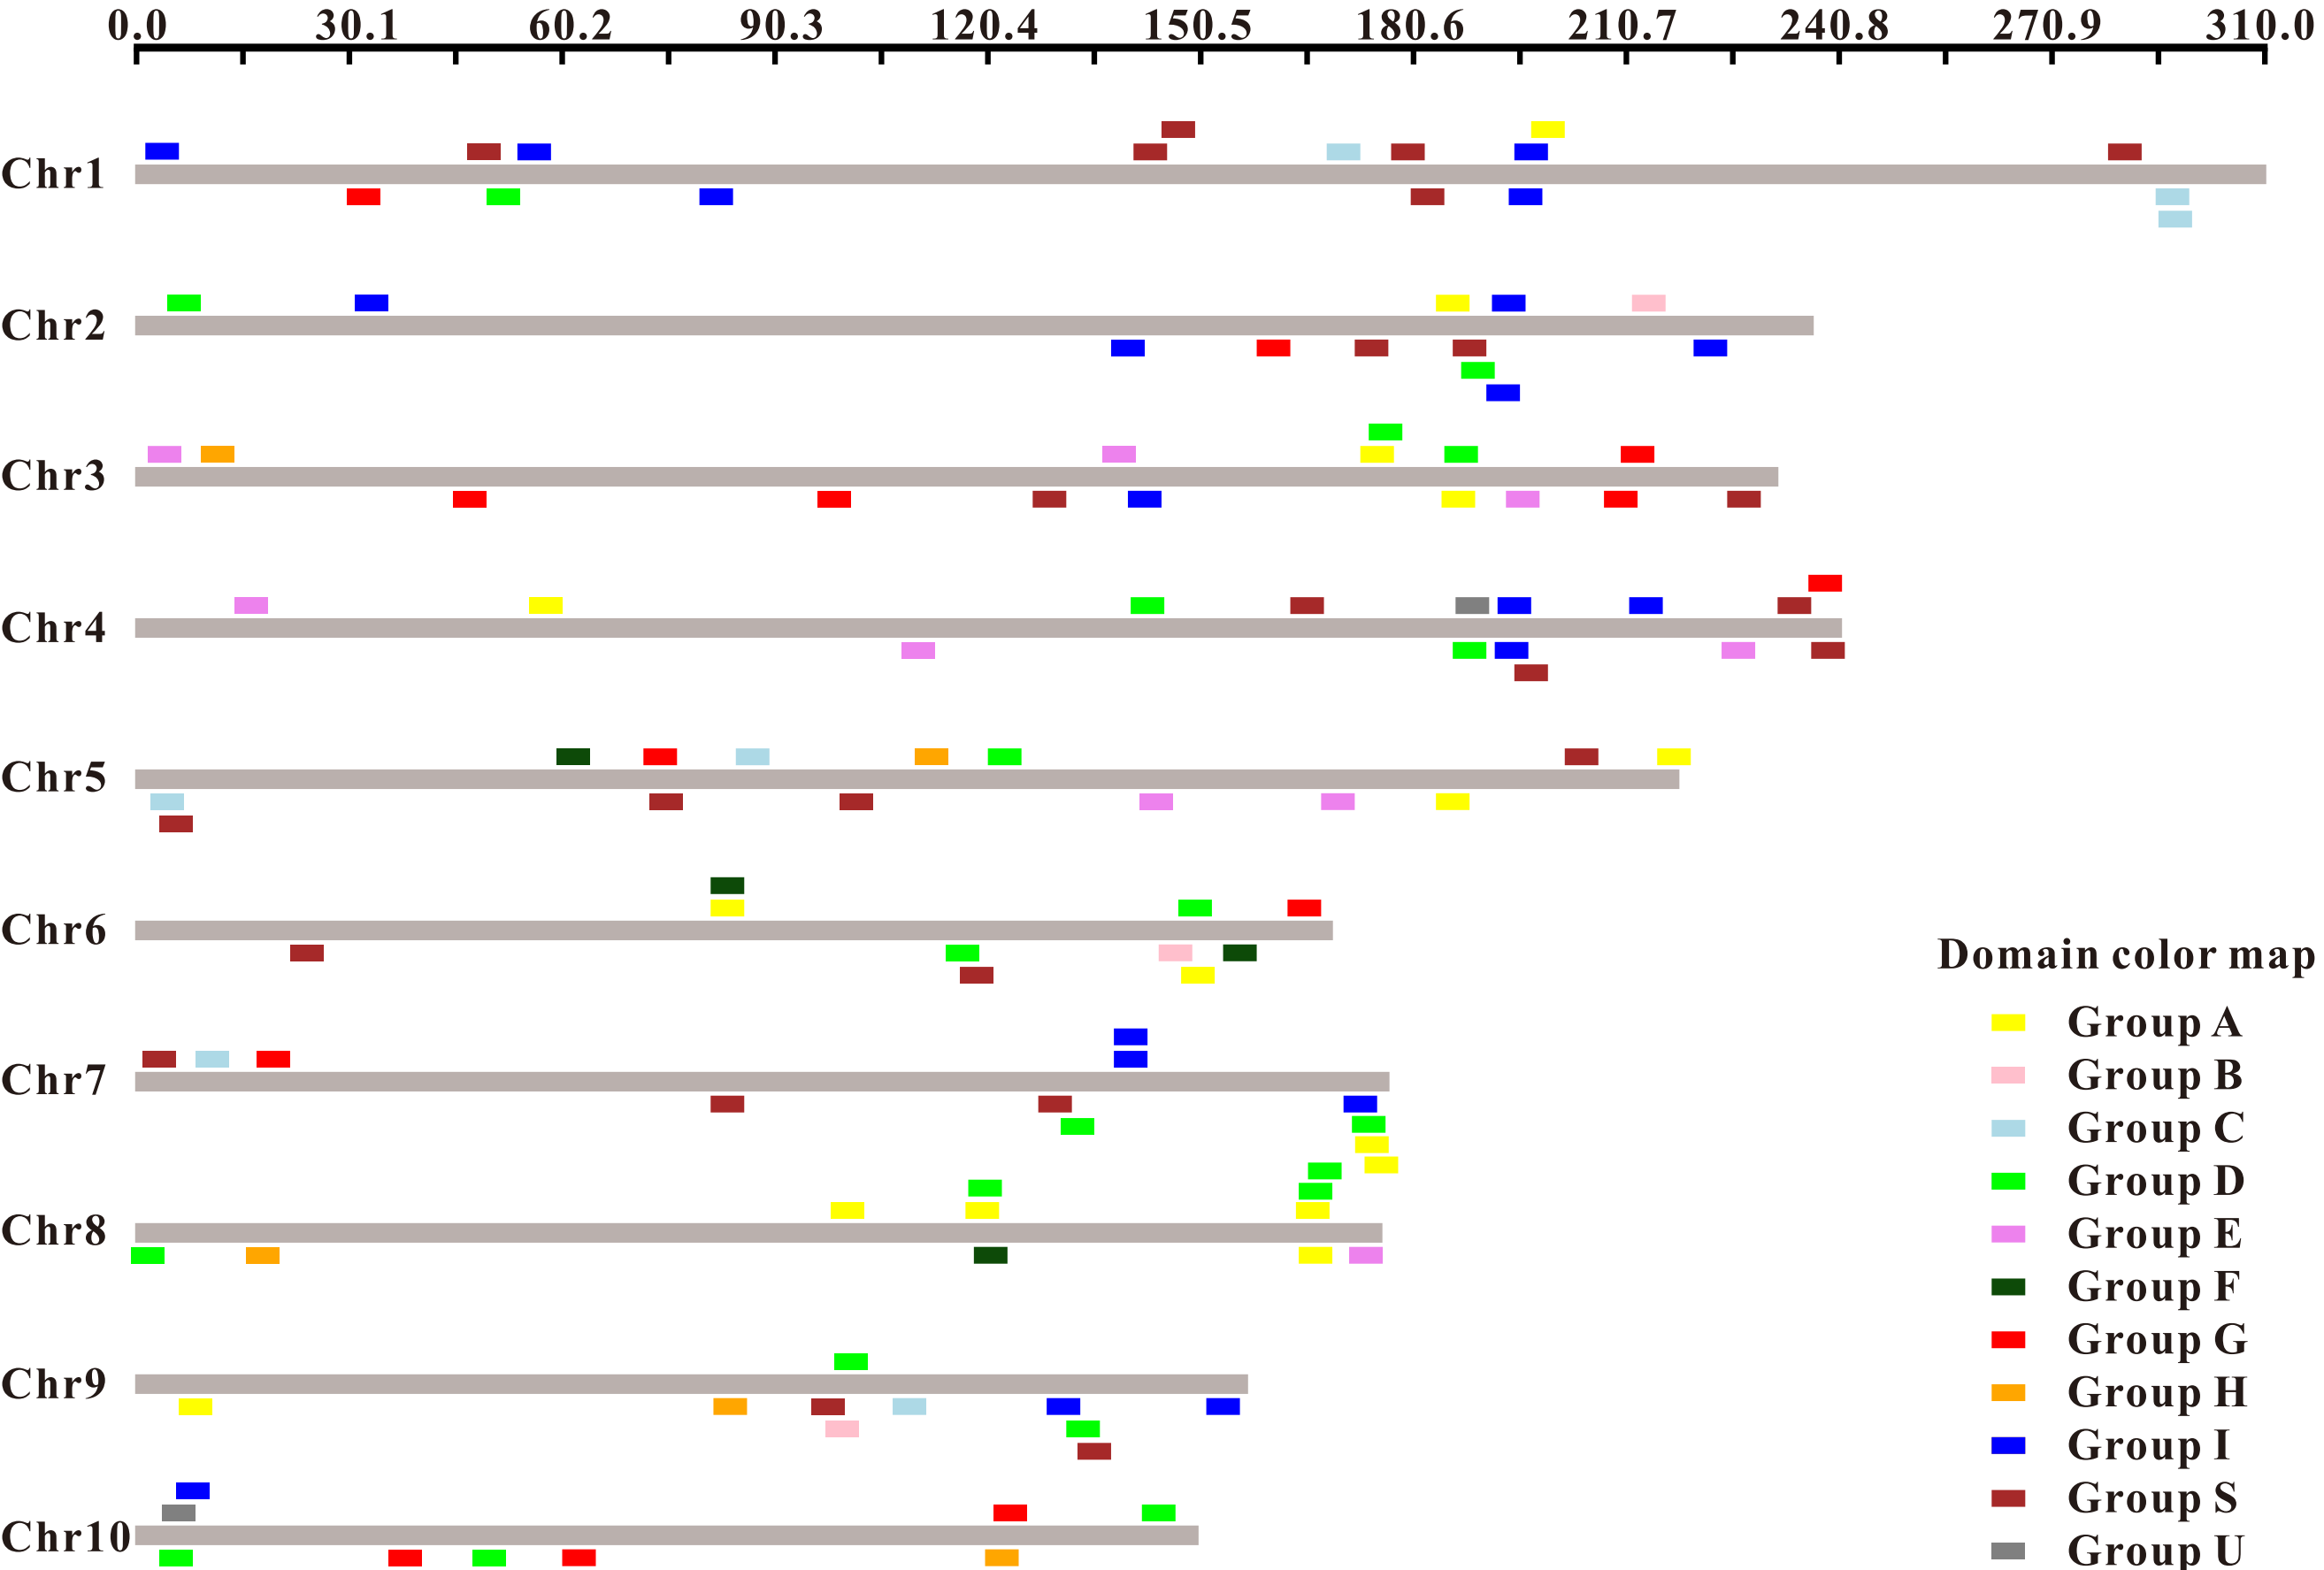

Supplement: supp_dss026_dss026supp_fig8.pdf [file supp_dss026_dss026supp_fig8.pdf]
