# Supplementary material for: Genome-Wide Analysis of bZIP-Encoding Genes in Maize
Source: PubMed Central journal article supplement — DNA Res. 2012 Oct 26;19(6):463–76. doi: 10.1093/dnares/dss026 (PMC3514857; doi:10.1093/dnares/dss026), 2012-10-26

**Supplemental Figure S10.** Segmental duplication blocks in maize genome and *ZmbZIP* genes distribution on chromosomes. In each chromosome, the segmental duplication blocks and *ZmbZIP* genes distribution are arranged vertically. The chromosomes are displayed as light gray bars, and the black boxes represent *ZmbZIP* genes. The color key of the syntenic blocks are presented in the top. The scale of maize chromosomes is vertical at the left side

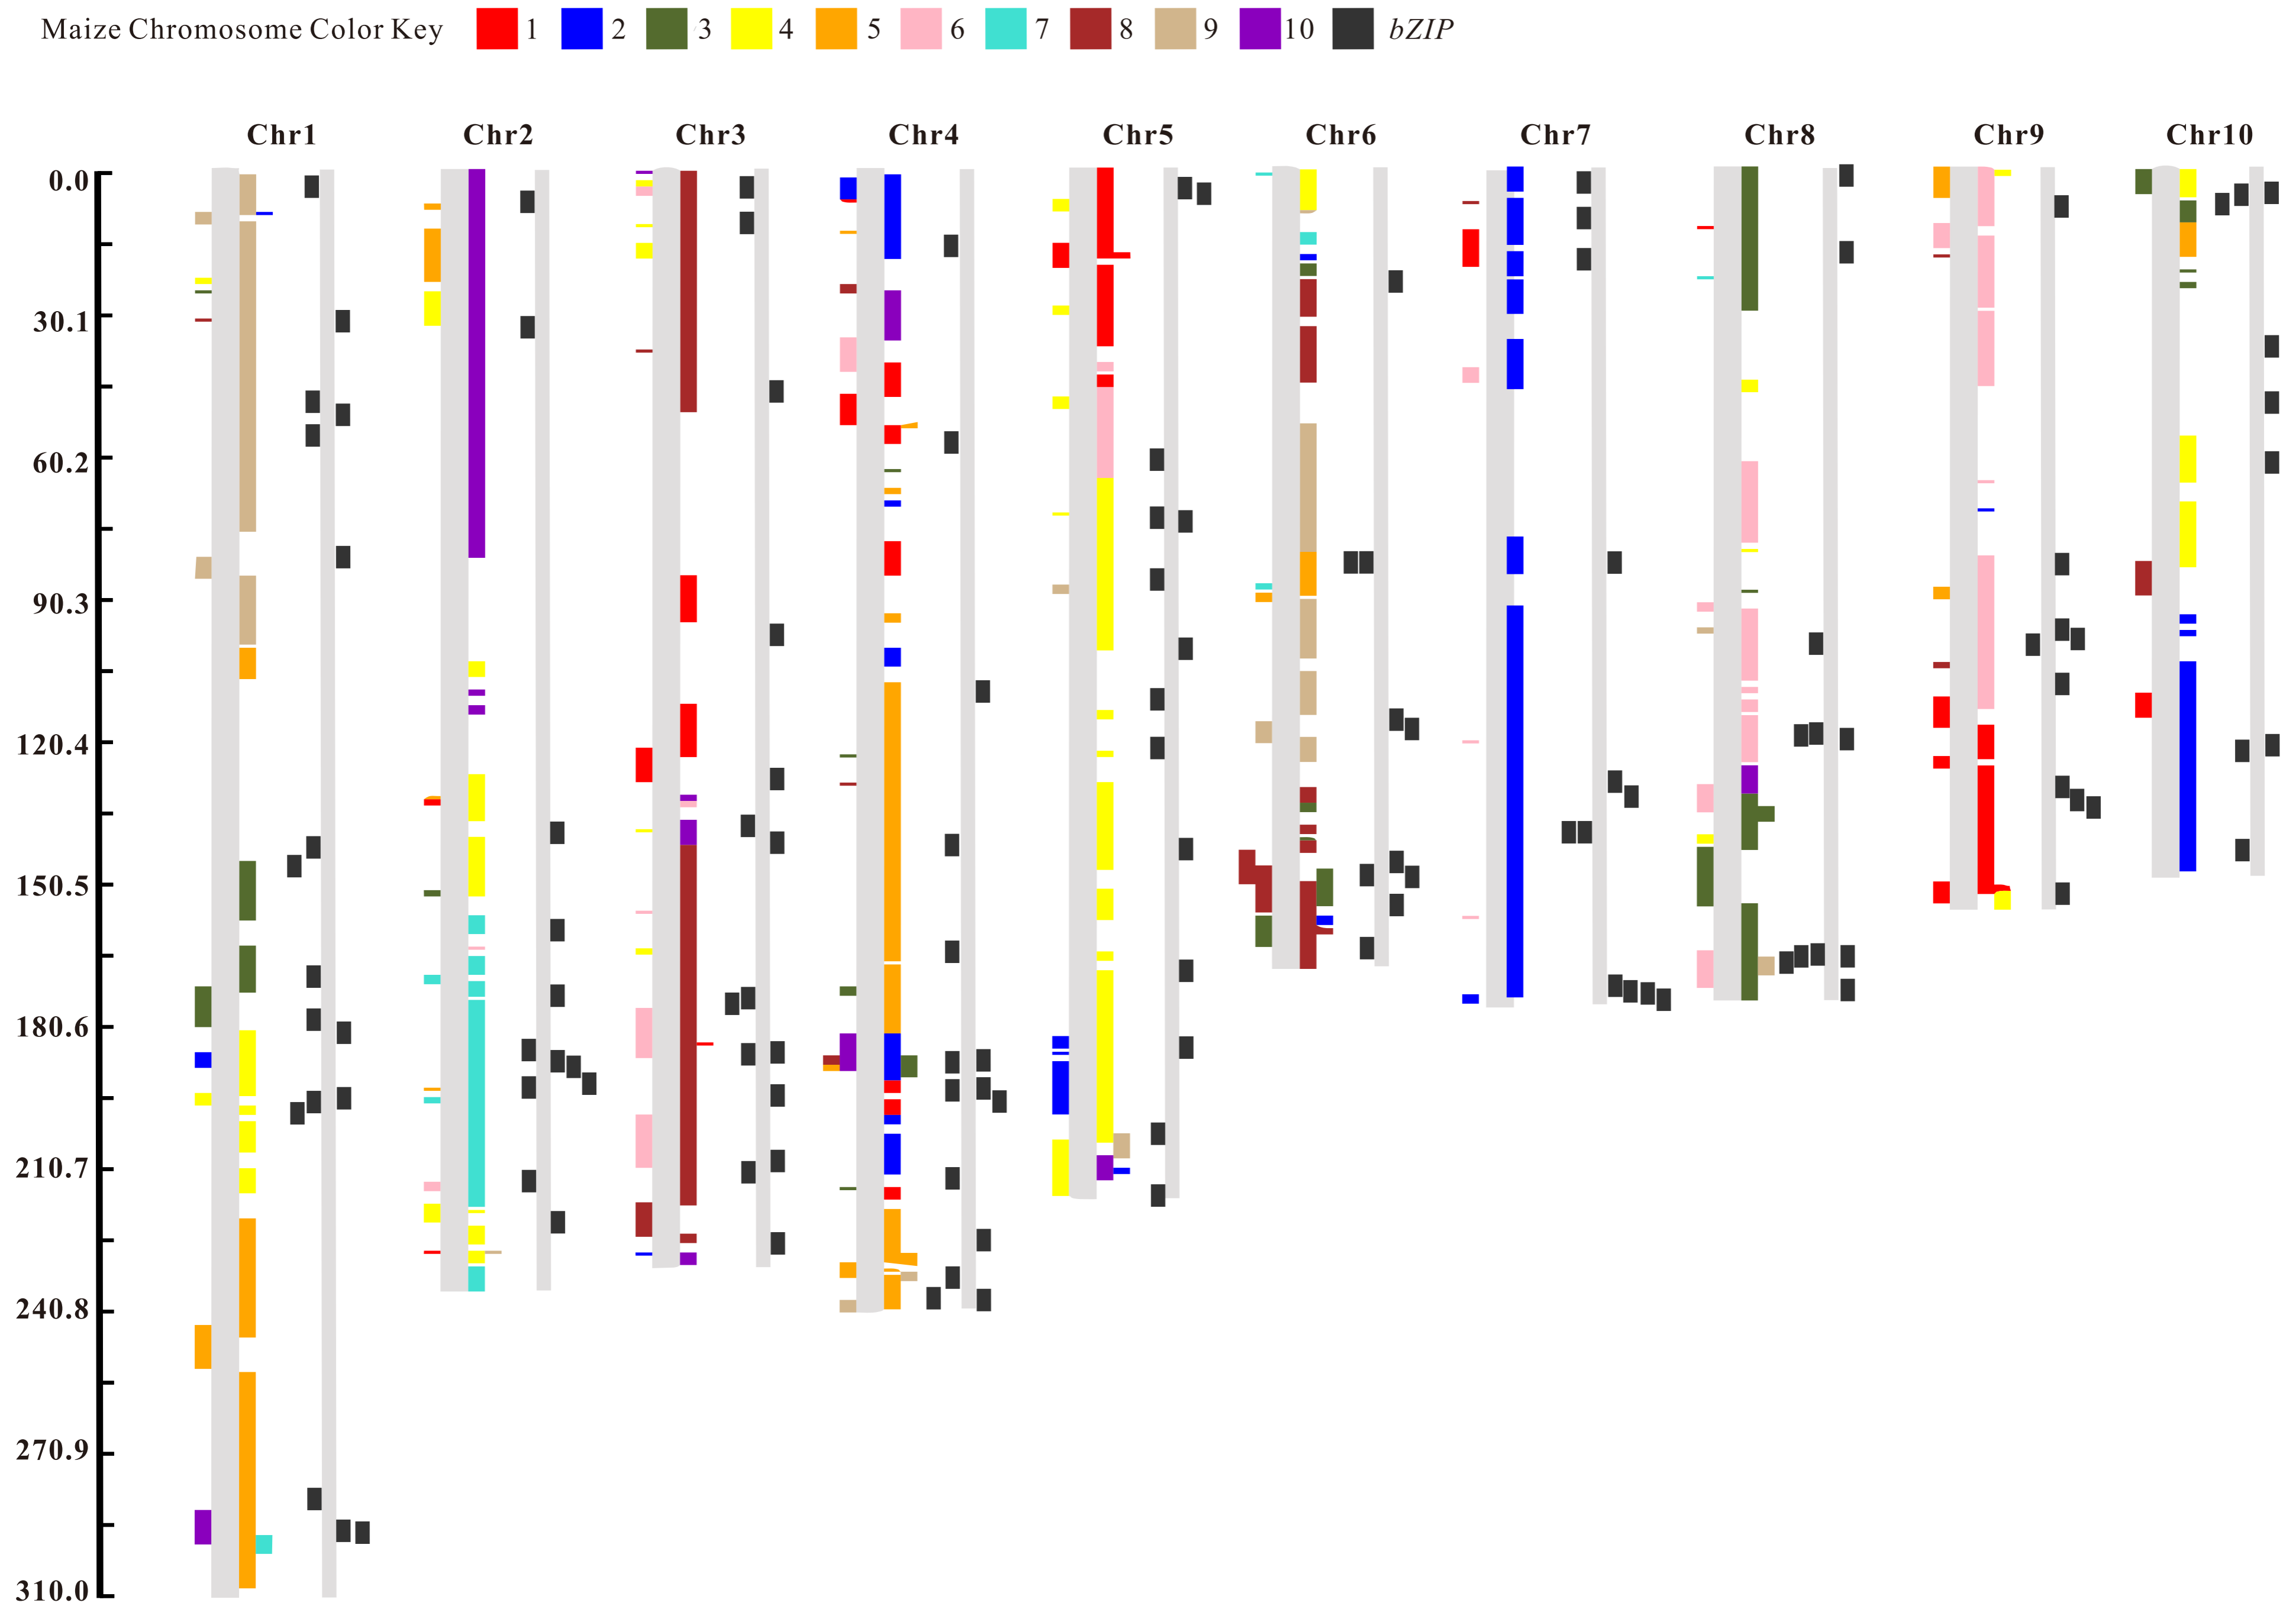

Supplement: supp_dss026_dss026supp_fig10.pdf [file supp_dss026_dss026supp_fig10.pdf]
