# Supplementary material for: Genome-Wide Analysis of bZIP-Encoding Genes in Maize
Source: PubMed Central journal article supplement — DNA Res. 2012 Oct 26;19(6):463–76. doi: 10.1093/dnares/dss026 (PMC3514857; doi:10.1093/dnares/dss026), 2012-10-26
Supplement: supp_dss026_dss026supp_table6.pdf [file supp_dss026_dss026supp_table6.pdf]

[illegible][illegible]
