# Supplementary material for: Genome-Wide Analysis of bZIP-Encoding Genes in Maize
Source: PubMed Central journal article supplement — DNA Res. 2012 Oct 26;19(6):463–76. doi: 10.1093/dnares/dss026 (PMC3514857; doi:10.1093/dnares/dss026), 2012-10-26
Supplement: supp_dss026_dss026supp_table7.pdf [file supp_dss026_dss026supp_table7.pdf]

**Supplemental Table S7.** CV values of signal intensities of 130 detected *ZmbZIP* transcripts in sixty tissues/organs ordered by three clusters.

| Cluster    | Name        | Sd          | Mean        | CV          |
|------------|-------------|-------------|-------------|-------------|
| I          | ZmbZIP79    | 0.526090491 | 11.9767045  | 0.043926148 |
|            | ZmbZIP39    | 0.605448929 | 12.017962   | 0.050378669 |
|            | ZmbZIP14    | 0.584582812 | 11.95080917 | 0.048915752 |
|            | ZmbZIP119.2 | 0.455596268 | 11.73377583 | 0.038827763 |
|            | ZmbZIP119.1 | 0.450479711 | 11.53187167 | 0.039063885 |
|            | ZmbZIP26    | 0.347872879 | 11.76621583 | 0.0295654   |
|            | ZmbZIP96    | 0.474812043 | 11.45002133 | 0.041468223 |
|            | ZmbZIP86    | 0.613037172 | 11.35465655 | 0.053989935 |
|            | ZmbZIP47    | 0.822064378 | 11.57455767 | 0.071023395 |
|            | ZmbZIP70    | 0.691150272 | 12.00132983 | 0.057589474 |
|            | ZmbZIP113   | 0.854610607 | 11.61879942 | 0.073554123 |
|            | ZmbZIP62.1  | 0.30348024  | 12.58727633 | 0.02411008  |
|            | ZmbZIP62.2  | 0.306116001 | 12.46351317 | 0.024560972 |
|            | ZmbZIP76    | 0.308523622 | 12.383726   | 0.024913634 |
|            | ZmbZIP31    | 0.50324589  | 12.5050435  | 0.040243434 |
|            | ZmbZIP120   | 0.447211286 | 12.595879   | 0.035504571 |
|            | ZmbZIP114   | 0.504566388 | 12.07948283 | 0.041770529 |
|            | ZmbZIP60.1  | 0.259017077 | 12.04250483 | 0.021508572 |
|            | ZmbZIP74    | 0.690496933 | 12.28247283 | 0.056218071 |
|            | ZmbZIP40.1  | 1.276572552 | 11.9297089  | 0.107007854 |
|            | ZmbZIP40.2  | 1.301675549 | 11.78019203 | 0.110496972 |
|            | ZmbZIP105   | 1.431021275 | 11.31813033 | 0.12643619  |
|            | ZmbZIP53    | 0.910945396 | 11.13155413 | 0.081834521 |
|            | ZmbZIP99    | 0.608776159 | 10.91241895 | 0.055787462 |
|            | ZmbZIP107   | 1.345418725 | 11.33997668 | 0.11864387  |
|            | ZmbZIP110.2 | 1.183586356 | 11.17640798 | 0.105900425 |
|            | ZmbZIP110.1 | 1.116652425 | 10.5812784  | 0.105530956 |
|            | ZmbZIP16    | 0.311111006 | 10.80296433 | 0.02879867  |
|            | ZmbZIP17    | 0.311111006 | 10.80296433 | 0.02879867  |
|            | ZmbZIP33    | 0.367424982 | 10.71300048 | 0.034297112 |
|            | ZmbZIP5     | 0.587918554 | 10.7847842  | 0.054513706 |
|            | ZmbZIP36.2  | 0.429548898 | 10.8659359  | 0.039531698 |
|            | ZmbZIP36.1  | 0.433496664 | 10.68478872 | 0.040571384 |
|            | ZmbZIP46    | 0.556173619 | 10.75598213 | 0.051708306 |
|            | ZmbZIP90    | 0.226443891 | 11.295157   | 0.020047875 |
|            | ZmbZIP2     | 0.420122165 | 11.10902483 | 0.037818096 |
|            | ZmbZIP20    | 0.597696669 | 10.30257943 | 0.058014274 |
|            | ZmbZIP55    | 0.548890535 | 10.01374847 | 0.054813693 |
|            | ZmbZIP45    | 0.515978495 | 10.00934237 | 0.05154969  |
|            | ZmbZIP82    | 0.941617476 | 10.9489728  | 0.086000531 |
|            | ZmbZIP23    | 0.903900133 | 10.65017993 | 0.084871818 |
| ZmbZIP73   | 1.019291343 | 10.92809528 | 0.093272553 |             |
| ZmbZIP9.1  | 1.161916331 | 11.03434743 | 0.105299959 |             |
| ZmbZIP9.3  | 1.191629078 | 10.06543362 | 0.118388251 |             |
| ZmbZIP64   | 1.470377118 | 10.18253007 | 0.144401942 |             |
| ZmbZIP87   | 2.126145468 | 11.80412702 | 0.180118823 |             |
| ZmbZIP21   | 0.518201888 | 13.33975233 | 0.03884644  |             |
| ZmbZIP13   | 0.506923625 | 13.25473217 | 0.038244728 |             |
| ZmbZIP28   | 0.450631691 | 13.5431475  | 0.033273779 |             |
| ZmbZIP35   | 0.510221258 | 13.1769705  | 0.03872068  |             |
| ZmbZIP8    | 0.738279235 | 12.74205    | 0.057940381 |             |
| E2 enzyme  | 0.151154285 | 14.94758667 | 0.010112287 |             |
| II         | ZmbZIP77.2  | 0.486326766 | 6.520349833 | 0.074585993 |
|            | ZmbZIP77.1  | 0.486326766 | 6.520349833 | 0.074585993 |
|            | ZmbZIP11    | 0.349371186 | 6.370522917 | 0.054841838 |
|            | ZmbZIP66    | 0.50170918  | 6.663845967 | 0.075288232 |
|            | ZmbZIP12    | 0.472061788 | 6.06237455  | 0.077867473 |
|            | ZmbZIP97.2  | 0.407431189 | 5.9961686   | 0.067948588 |
|            | ZmbZIP52    | 0.56723661  | 6.4611281   | 0.087792194 |
|            | ZmbZIP121   | 0.843072836 | 6.144695267 | 0.13720336  |
|            | ZmbZIP111   | 0.616313357 | 5.970232233 | 0.103231052 |
|            | ZmbZIP75    | 0.780890852 | 6.646835717 | 0.117483098 |
|            | ZmbZIP80    | 0.997465013 | 5.65441365  | 0.176404677 |
|            | ZmbZIP117   | 1.079290615 | 5.923335933 | 0.182209928 |
|            | ZmbZIP15    | 0.276086651 | 5.665321333 | 0.048732743 |
|            | ZmbZIP109   | 0.275367705 | 5.475706917 | 0.050288978 |
|            | ZmbZIP3     | 0.251314682 | 5.578428933 | 0.045051158 |
|            | ZmbZIP71    | 0.273121926 | 5.6912119   | 0.047990117 |
|            | ZmbZIP51    | 0.381891355 | 5.646213083 | 0.067636724 |
|            | ZmbZIP57    | 0.40403782  | 5.387106967 | 0.075000891 |
|            | ZmbZIP69    | 0.596423361 | 5.592620033 | 0.106644713 |
|            | ZmbZIP88    | 0.471881297 | 5.4553928   | 0.086498134 |
|            | ZmbZIP61    | 0.256583561 | 5.18846315  | 0.04945271  |
|            | ZmbZIP29    | 0.276627198 | 5.159996883 | 0.053609954 |
|            | ZmbZIP10    | 0.183734    | 4.978065317 | 0.036908716 |
|            | ZmbZIP84    | 0.203716554 | 4.97208655  | 0.040972045 |
|            | ZmbZIP122   | 0.357653547 | 4.879778317 | 0.073292991 |
|            | ZmbZIP100   | 1.216224383 | 6.252104933 | 0.194530386 |
|            | ZmbZIP118   | 1.209814394 | 6.9160342   | 0.17492892  |
|            | ZmbZIP98    | 0.442471252 | 7.29181965  | 0.060680499 |
|            | ZmbZIP48    | 0.627039125 | 7.002856517 | 0.089540479 |
|            | ZmbZIP116   | 0.827462271 | 7.29693225  | 0.113398651 |
|            | ZmbZIP6     | 0.81324615  | 6.877837583 | 0.118241546 |
|            | ZmbZIP101   | 0.902218039 | 7.507848583 | 0.120169983 |
|            | ZmbZIP18.3  | 0.885487342 | 7.038013817 | 0.125814948 |
|            | ZmbZIP18.1  | 0.885487342 | 7.038013817 | 0.125814948 |
|            | ZmbZIP18.2  | 0.900481509 | 7.0609353   | 0.127530061 |
|            | ZmbZIP24    | 0.904081415 | 7.05908535  | 0.12807345  |
|            | ZmbZIP49    | 0.965467784 | 6.899091433 | 0.139941294 |
|            | ZmbZIP37    | 0.517304875 | 7.827335583 | 0.066089523 |
|            | ZmbZIP78    | 0.683995145 | 7.754546783 | 0.088205689 |
|            | ZmbZIP115   | 0.42697475  | 7.651954133 | 0.055799439 |
|            | ZmbZIP59    | 0.691963684 | 7.915584233 | 0.087417892 |
| ZmbZIP77.3 | 0.784852723 | 7.68789835  | 0.102089373 |             |
| ZmbZIP30   | 0.753608157 | 7.1608384   | 0.105240213 |             |
| ZmbZIP103  | 0.967176493 | 7.902267383 | 0.122392276 |             |
| ZmbZIP50   | 1.649451342 | 7.315079417 | 0.225486457 |             |
| ZmbZIP68   | 1.549086099 | 7.50974545  | 0.206276778 |             |
| ZmbZIP72   | 2.110350932 | 7.040702433 | 0.299735851 |             |
| III        | ZmbZIP81    | 0.631197025 | 9.294985667 | 0.067907262 |
|            | ZmbZIP102   | 0.546217718 | 8.782308783 | 0.06219523  |
|            | ZmbZIP34    | 0.750832251 | 9.662041867 | 0.07770948  |
|            | ZmbZIP63    | 0.819768182 | 9.3936231   | 0.087268583 |
|            | ZmbZIP65.1  | 1.08505165  | 8.92638635  | 0.121555533 |
|            | ZmbZIP123   | 0.775894521 | 8.501090133 | 0.091270003 |
|            | ZmbZIP95    | 0.783666454 | 8.597052233 | 0.091155251 |
|            | ZmbZIP9.4   | 1.175977696 | 9.07803865  | 0.129540944 |
|            | ZmbZIP9.2   | 1.175977696 | 9.07803865  | 0.129540944 |
|            | ZmbZIP43    | 1.315223437 | 8.79241875  | 0.149586078 |
|            | ZmbZIP44    | 1.7183417   | 8.941537417 | 0.192175195 |
|            | ZmbZIP7     | 1.784099323 | 8.286708883 | 0.215296488 |
|            | ZmbZIP22    | 2.043963001 | 8.713312483 | 0.23457933  |
|            | ZmbZIP125   | 1.573079048 | 8.78456945  | 0.179072982 |
|            | ZmbZIP38    | 1.145519985 | 9.162906783 | 0.125017095 |
|            | ZmbZIP112.2 | 1.726896016 | 9.836846467 | 0.175553824 |
|            | ZmbZIP112.1 | 1.660114818 | 8.753874017 | 0.189643444 |
|            | ZmbZIP108   | 2.749455402 | 8.2733154   | 0.332328126 |
|            | ZmbZIP67    | 2.005342367 | 7.45119905  | 0.269130157 |
|            | ZmbZIP19.2  | 1.329156494 | 9.694554067 | 0.137103418 |
|            | ZmbZIP92    | 1.097296733 | 9.647691217 | 0.113736718 |
|            | ZmbZIP19.1  | 1.064301406 | 9.065997883 | 0.117394844 |
|            | ZmbZIP94    | 1.757973975 | 9.395758517 | 0.187102933 |
|            | ZmbZIP1     | 1.72746766  | 9.771142983 | 0.176792793 |
|            | ZmbZIP41    | 2.098101834 | 9.055093933 | 0.231704039 |
|            | ZmbZIP56    | 2.113316906 | 7.394345733 | 0.285801744 |
|            | ZmbZIP89    | 2.308752489 | 7.909709917 | 0.291888389 |
|            | ZmbZIP25    | 1.588501608 | 7.403151367 | 0.214571002 |
|            | ZmbZIP104   | 2.117936748 | 7.6551974   | 0.27666651  |
|            | ZmbZIP91    | 1.678581818 | 7.603319267 | 0.220769608 |
|            | ZmbZIP27    | 2.163984893 | 6.721037017 | 0.321971875 |
|            | ZmbZIP85    | 3.821009069 | 8.659942917 | 0.441227974 |
