# Supplementary figures and images for: Genome-Wide Analysis of bZIP-Encoding Genes in Maize
Source: PubMed Central journal article supplement — DNA Res. 2012 Oct 26;19(6):463–76. doi: 10.1093/dnares/dss026 (PMC3514857; doi:10.1093/dnares/dss026), 2012-10-26

Supplemental Figure S3. The map of intron-exon arrangement of *ZmbZIP* genes

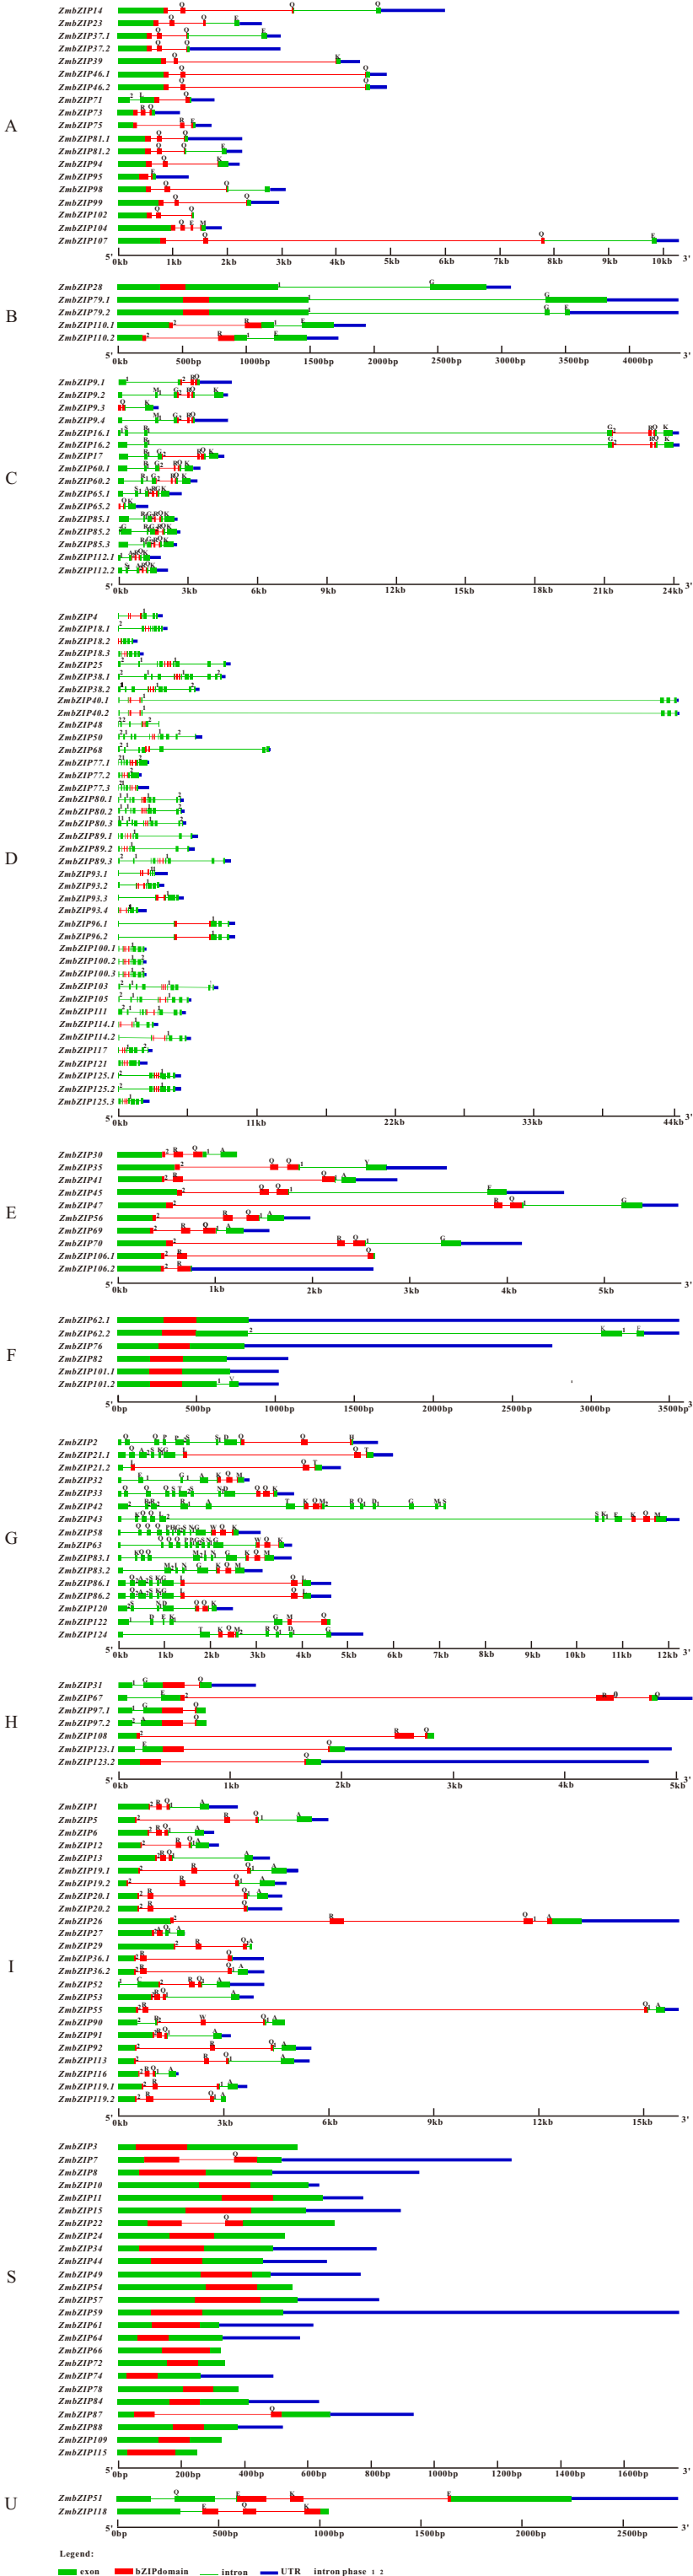

Supplement: supp_dss026_dss026supp_fig3.pdf [file supp_dss026_dss026supp_fig3.pdf]

# Supplemental Figure S5. Distribution of additional conserved motifs identified by MEME.

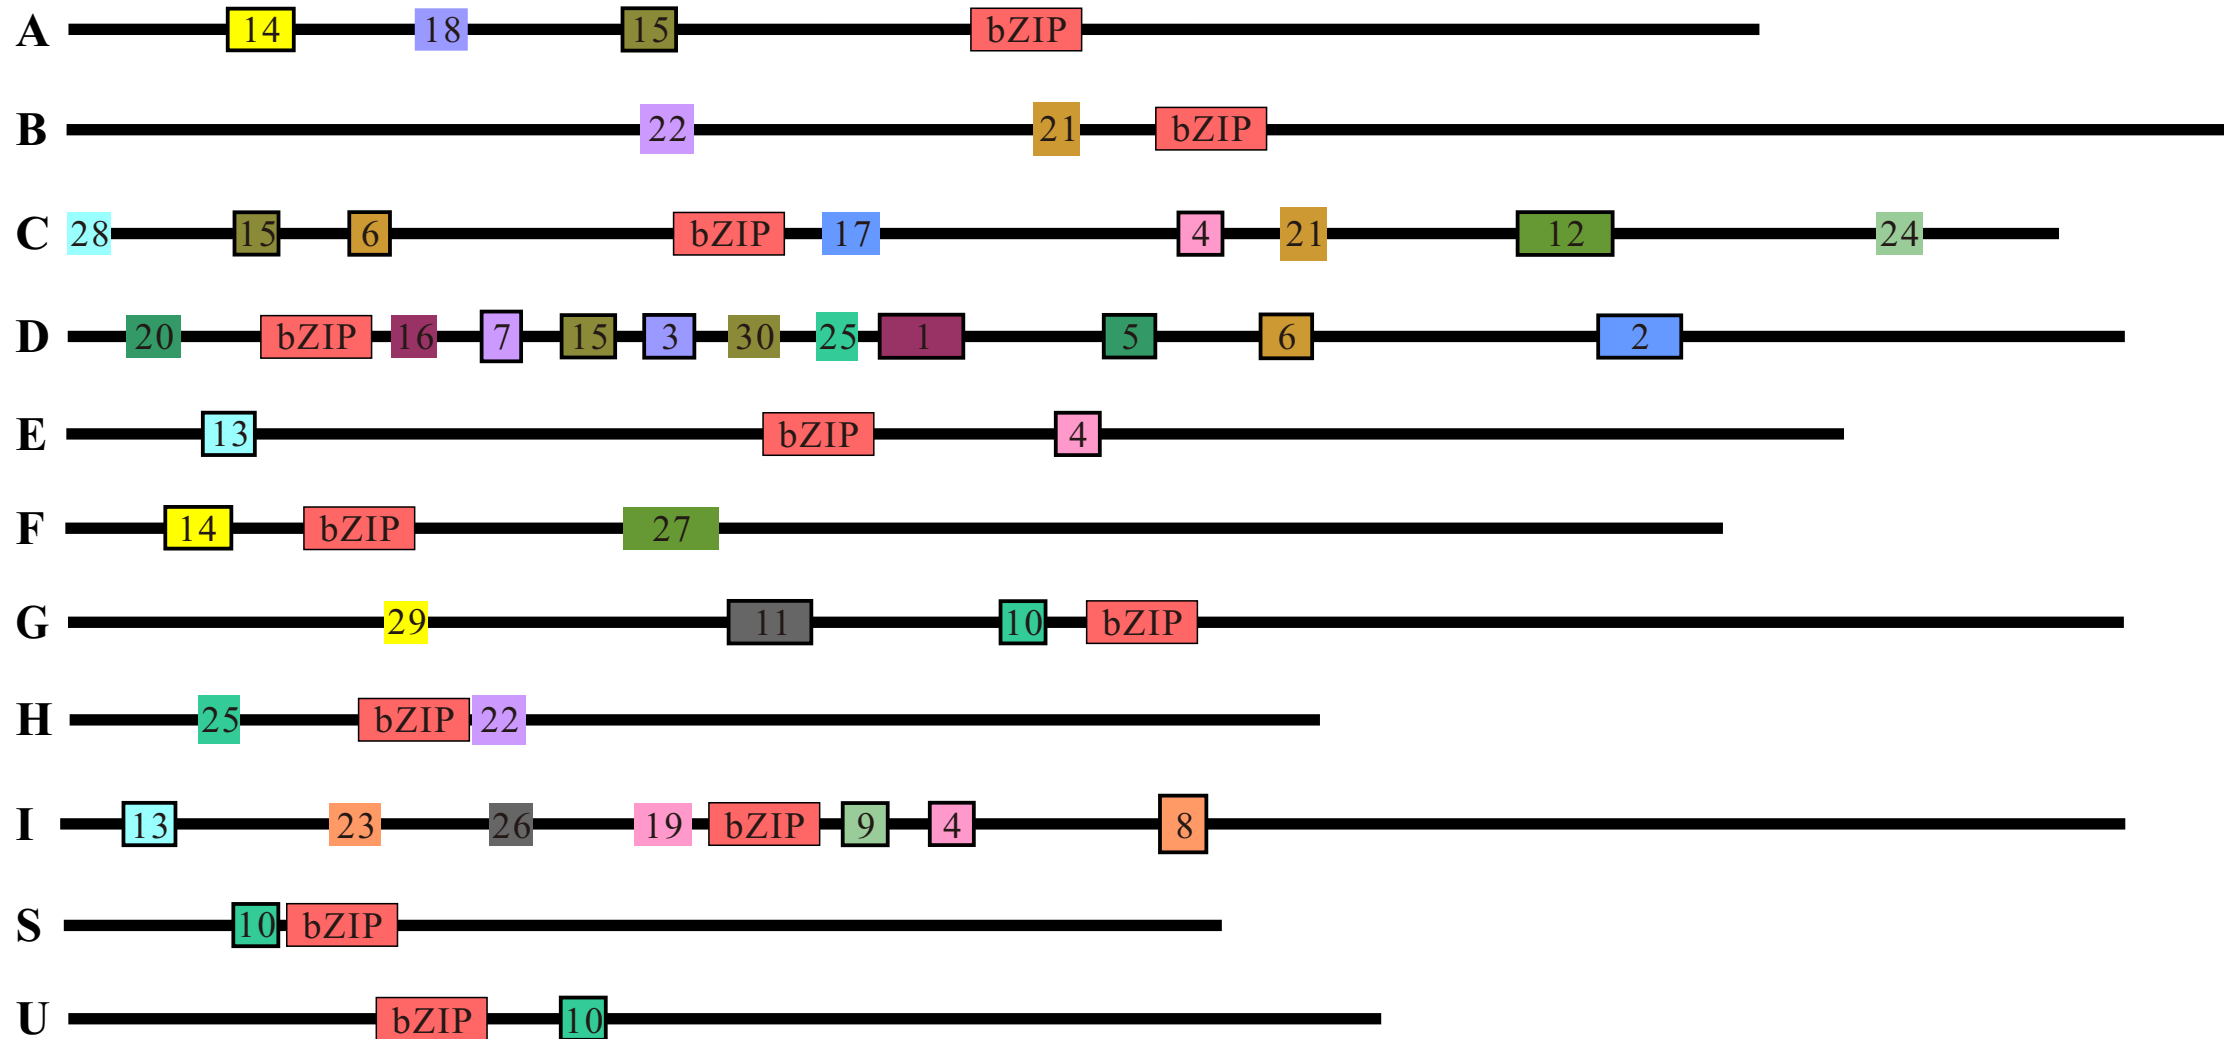

Supplement: supp_dss026_dss026supp_fig5.pdf [file supp_dss026_dss026supp_fig5.pdf]

**Supplemental Figure S9.** Histogram of the number of *ZmbZIP* genes on each chromosome.

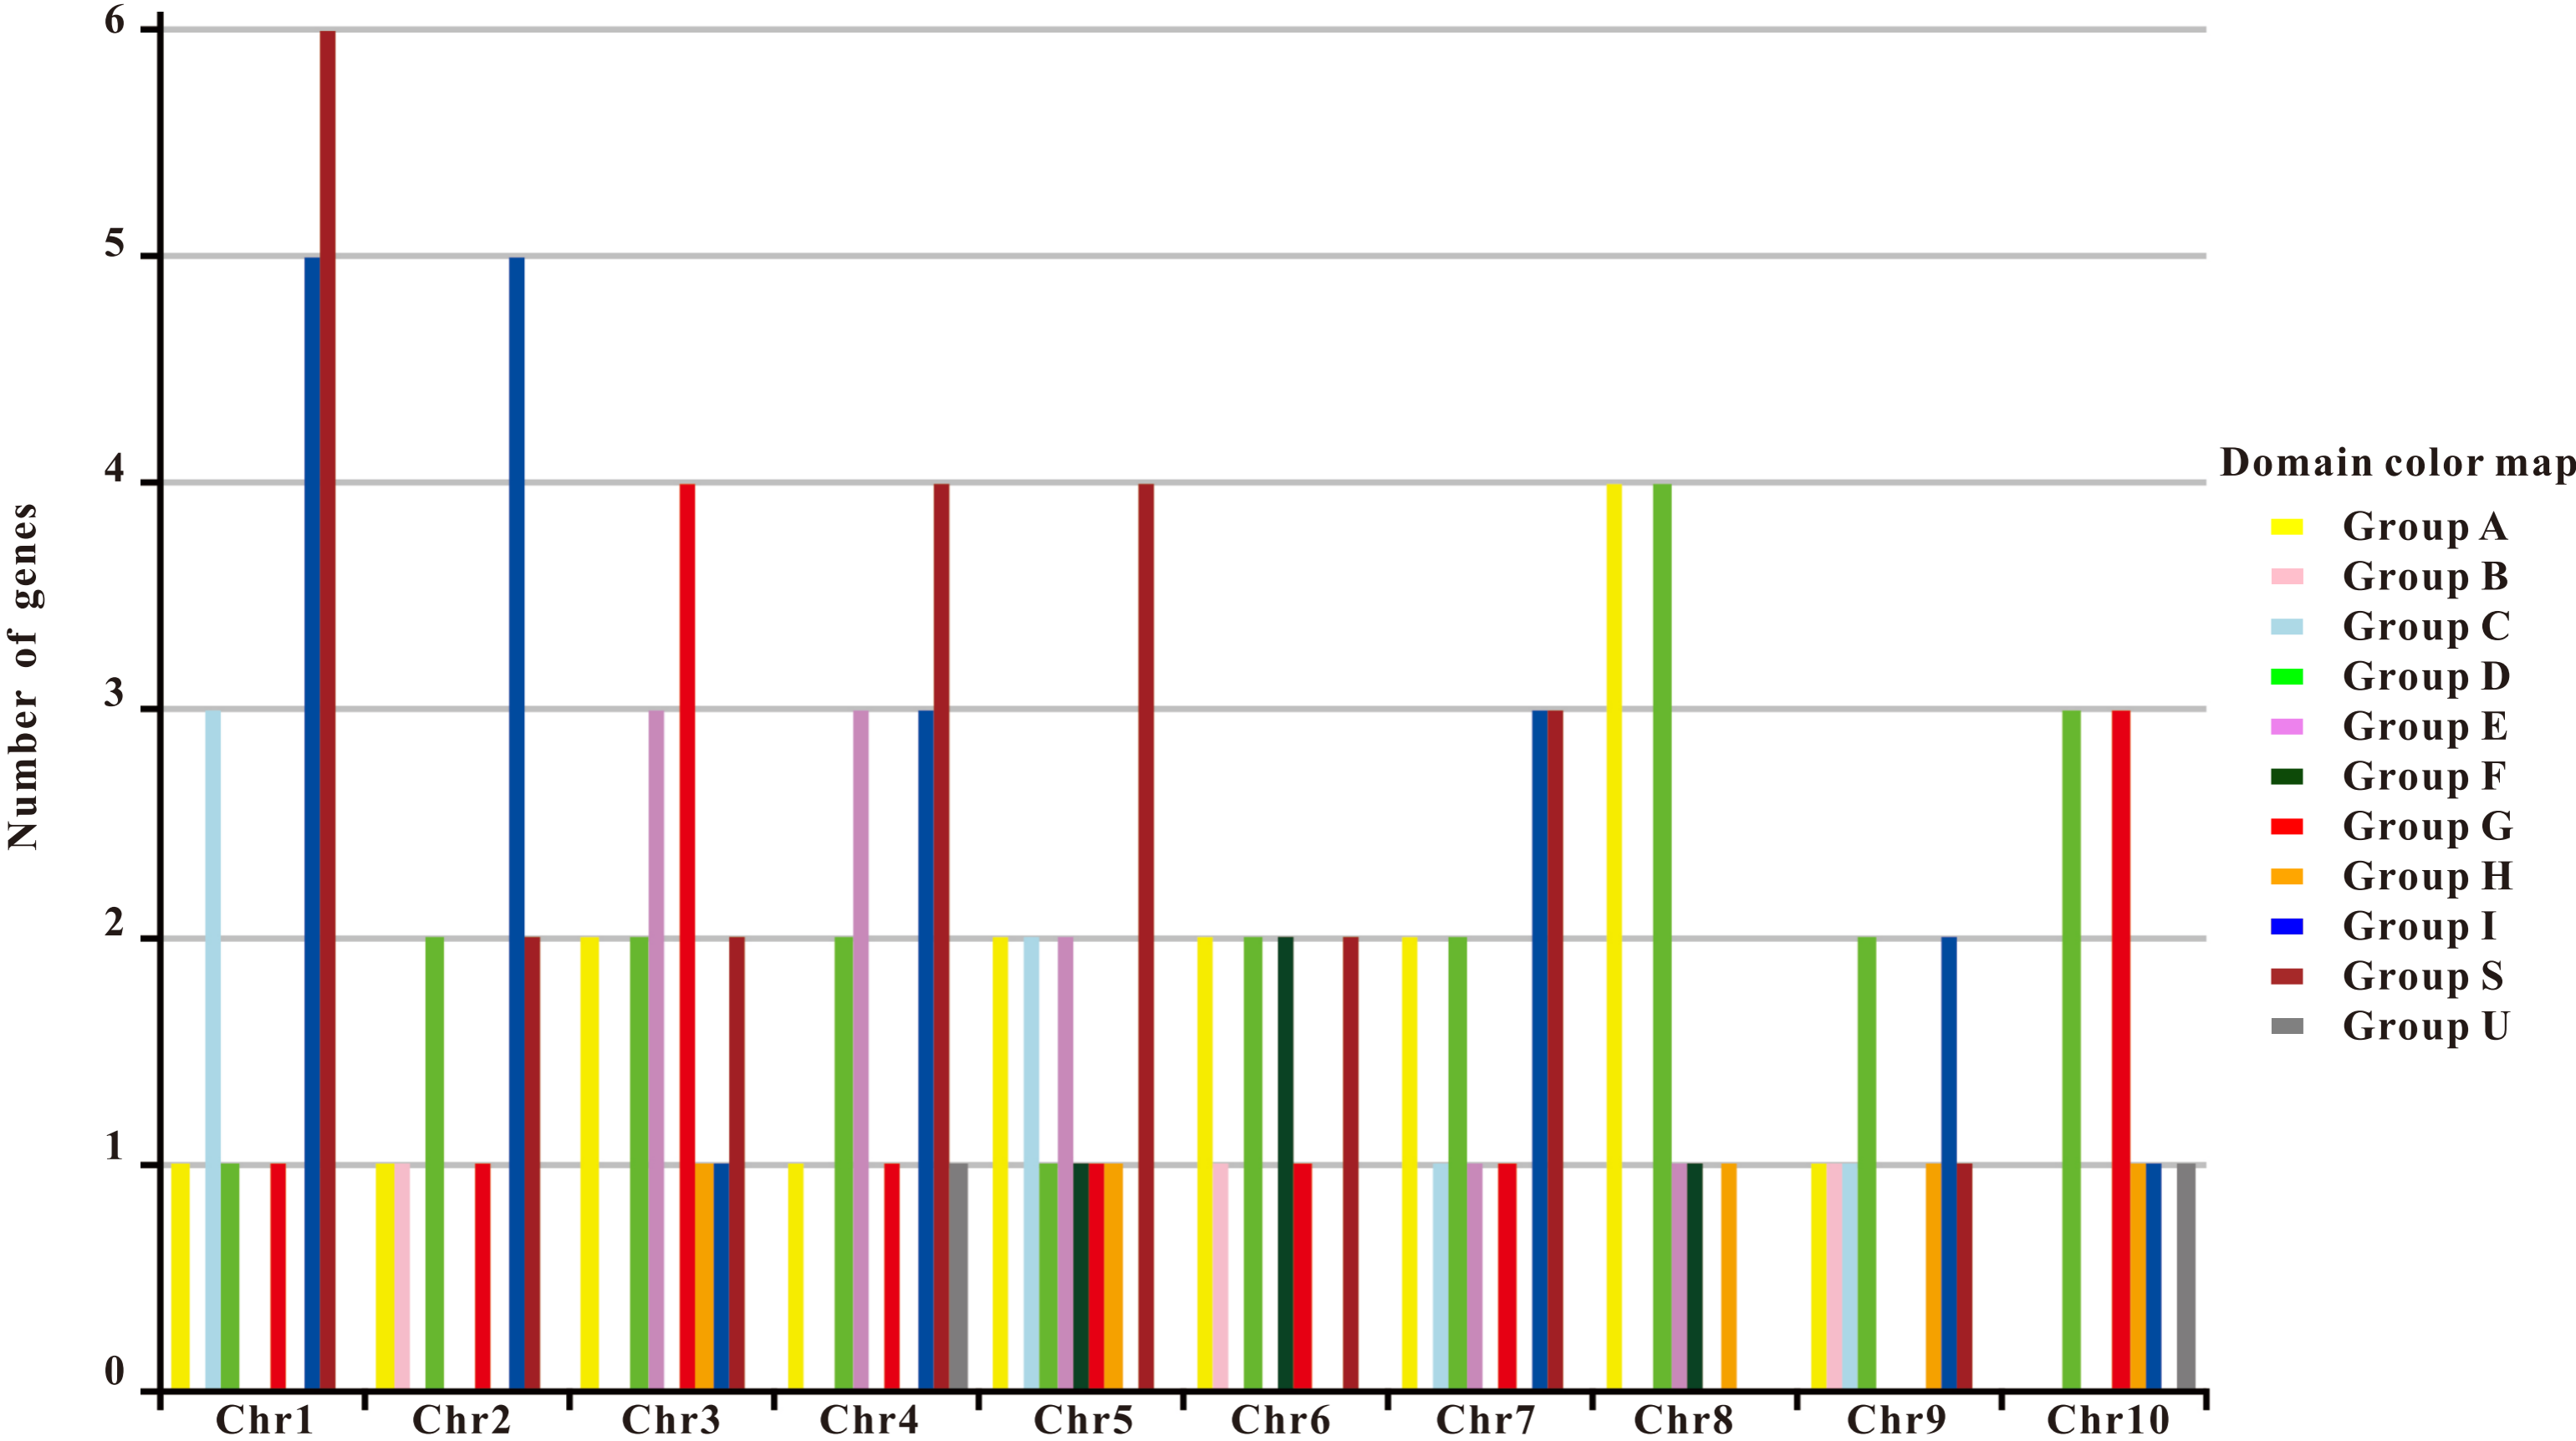

Supplement: supp_dss026_dss026supp_fig9.pdf [file supp_dss026_dss026supp_fig9.pdf]
